# Supplementary material for: Synthesis and biological assessment of novel 4H-chromene-3-carbonitrile derivatives as tyrosinase inhibitors
Source: PubMed Central journal article supplement — BMC Chem. 2024 Sep 28;18(1):187. doi: 10.1186/s13065-024-01305-0 (PMC11439338; doi:10.1186/s13065-024-01305-0), 2024-09-28
Supplement: 13065_2024_1305_MOESM1_ESM.pdf [file 13065_2024_1305_MOESM1_ESM.pdf]

## Supporting Information

# Synthesis and Biological Assessment of Novel 4H-Chromene-3-Carbonitrile Derivatives as Tyrosinase Inhibitors

### A) spectrums of compound 6a:

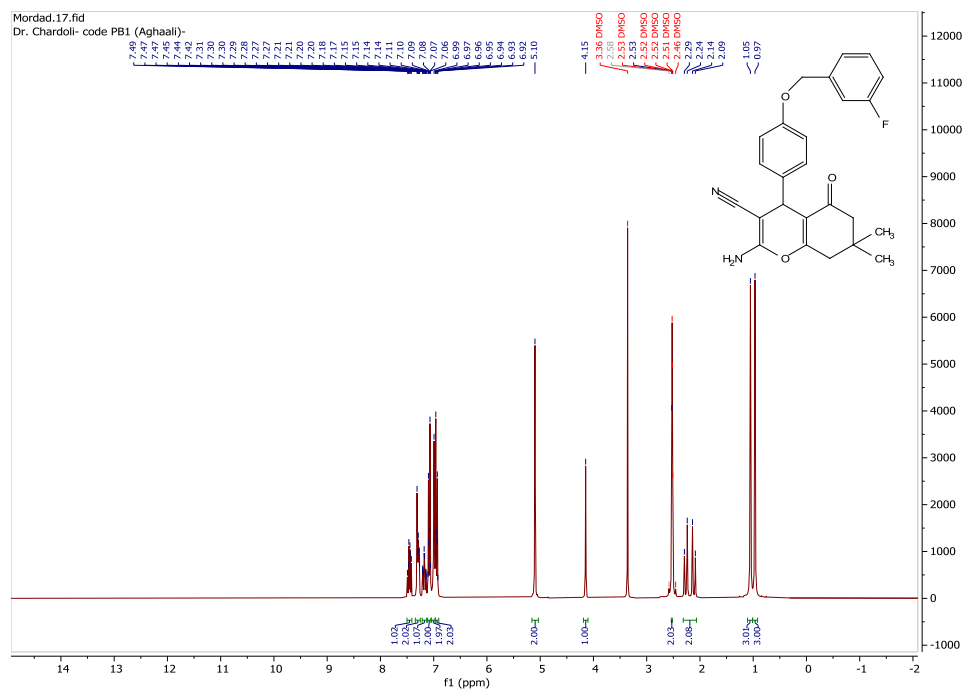

Figure S1.  $^1\text{H-NMR}$  spectrum of 2-amino-4-(4-((3-fluorobenzyl)oxy)phenyl)-7,7-dimethyl-5-oxo-5,6,7,8-tetrahydro-4H-chromene-3-carbonitrile(6a)

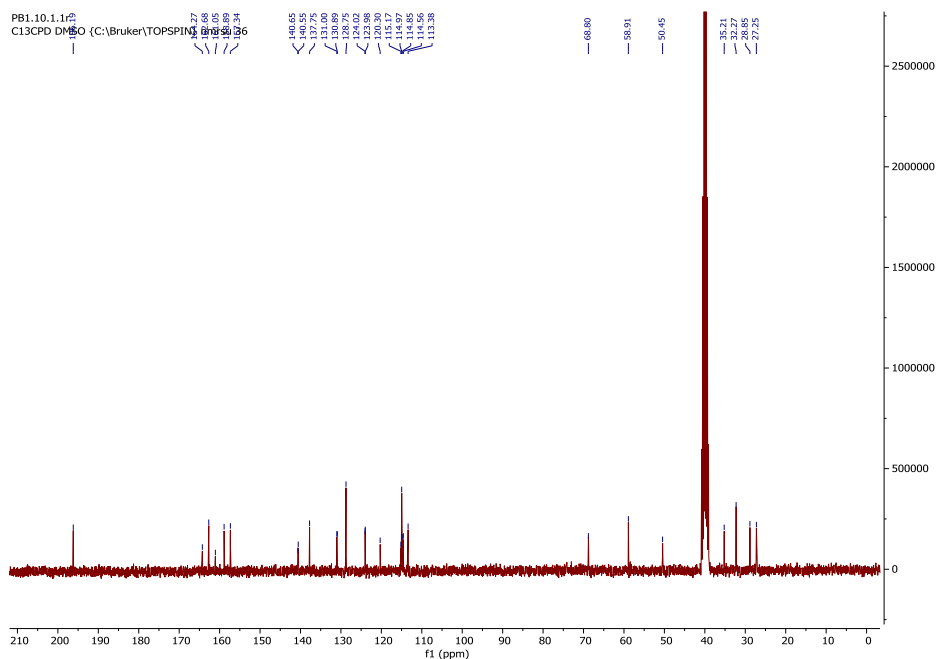

Figure S2.  $^{13}\text{C}$ -NMR spectrum of 2-amino-4-(4-((3-fluorobenzyl)oxy)phenyl)-7,7-dimethyl-5-oxo-5,6,7,8-tetrahydro-4H-chromene-3-carbonitrile(6a)

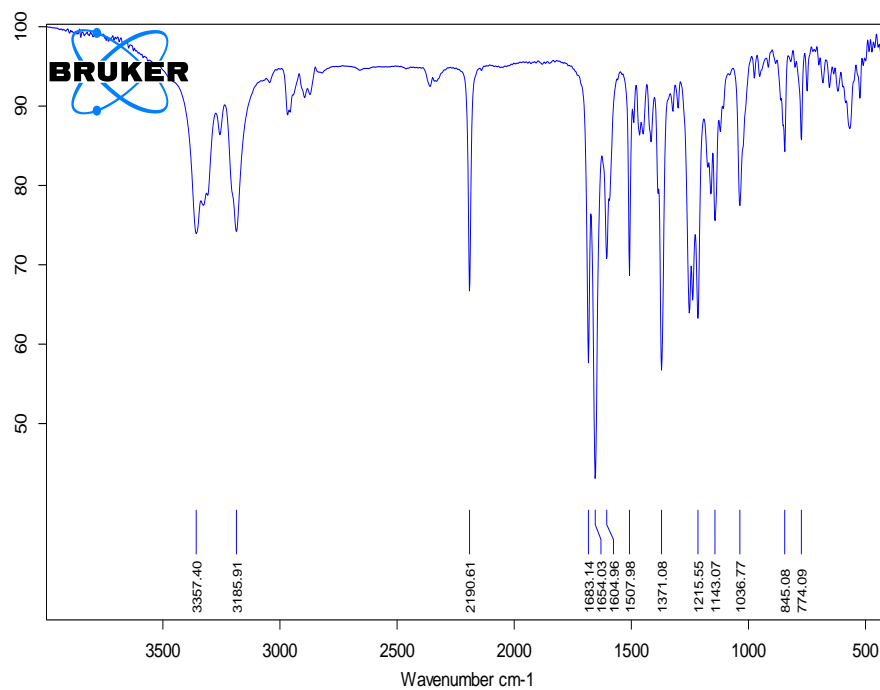

Figure S3. FT-IR spectrum of 2-amino-4-(4-((3-fluorobenzyl)oxy)phenyl)-7,7-dimethyl-5-oxo-5,6,7,8-tetrahydro-4H-chromene-3-carbonitrile(6a)

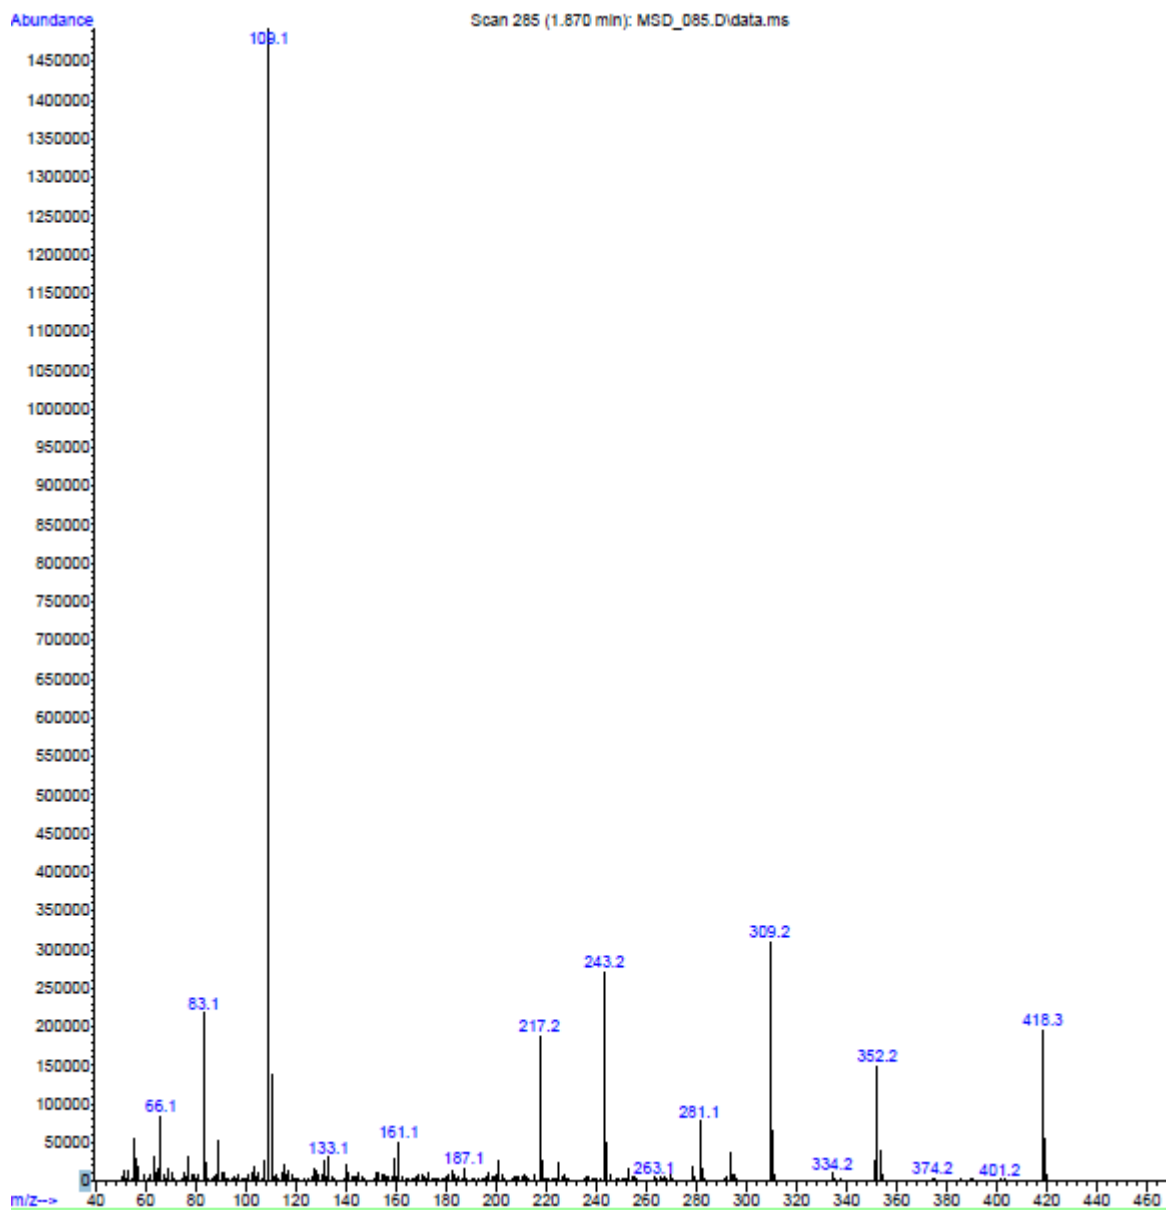

Figure S4. Mass spectrum of 2-amino-4-(4-((3-fluorobenzyl)oxy)phenyl)-7,7-dimethyl-5-oxo-5,6,7,8-tetrahydro-4H-chromene-3-carbonitrile(6a)

**B) spectra of compound 6b:**

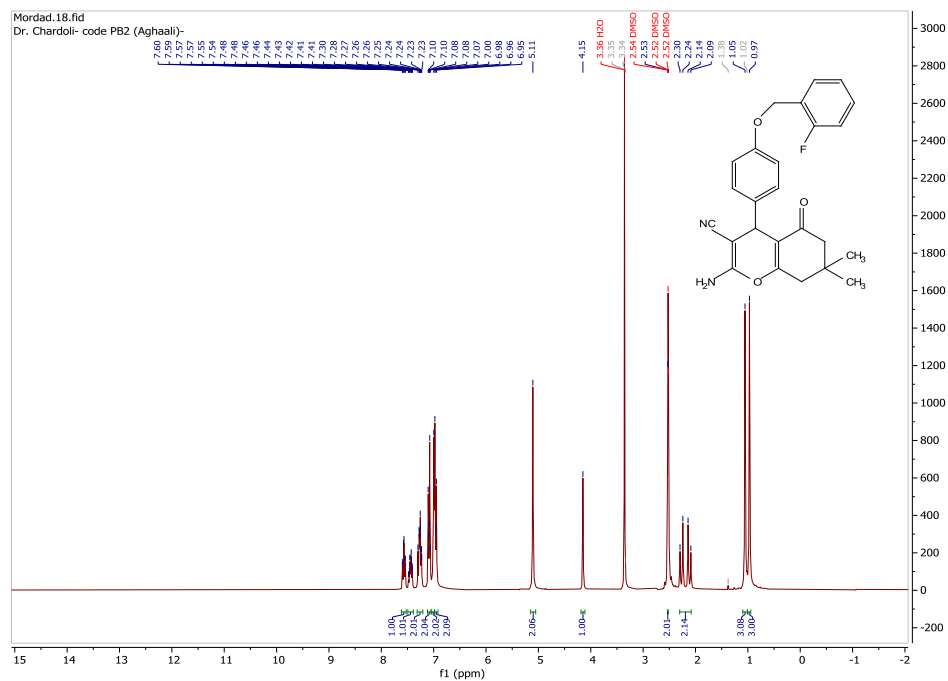

Figure S5. <sup>1</sup>H-NMR spectrum of 2-amino-4-(4-((2-fluorobenzyl)oxy)phenyl)-7,7-dimethyl-5-oxo-5,6,7,8-tetrahydro-4H-chromene-3-carbonitrile(6b)

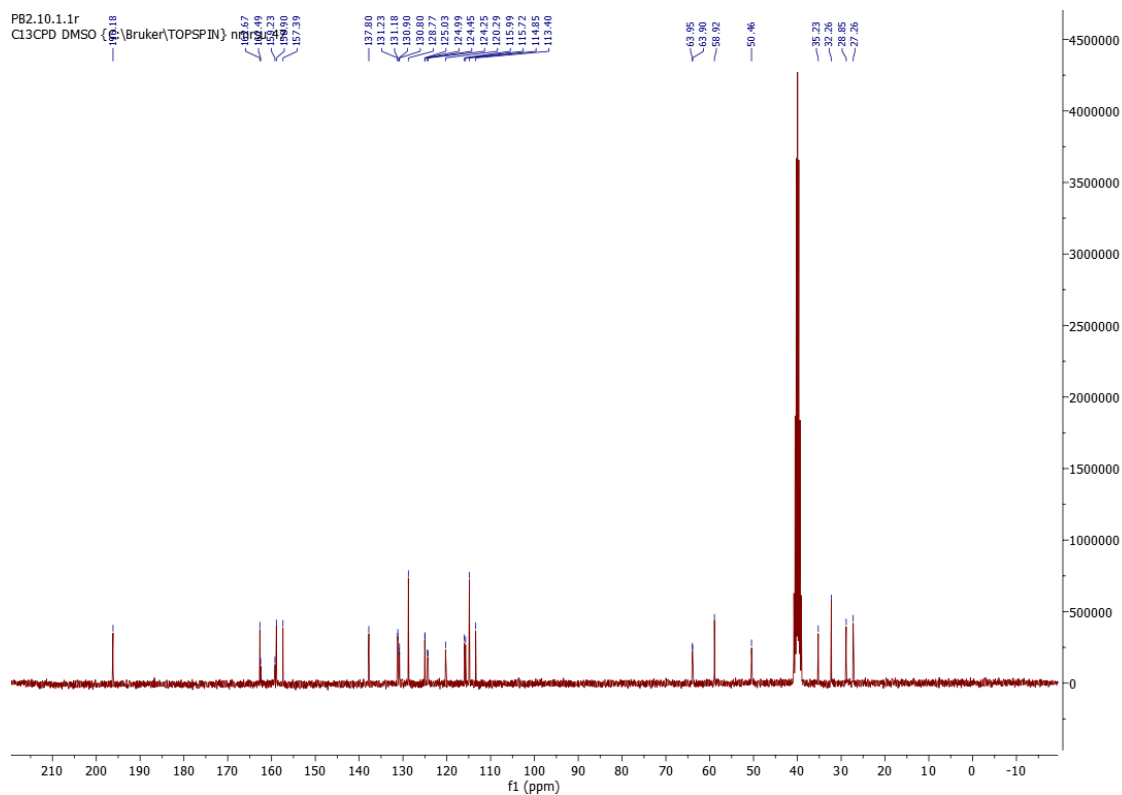

Figure S6.  $^{13}\text{C}$ -NMR spectrum of 2-amino-4-(4-((2-fluorobenzyl)oxy)phenyl)-7,7-dimethyl-5-oxo-5,6,7,8-tetrahydro-4H-chromene-3-carbonitrile(6b)

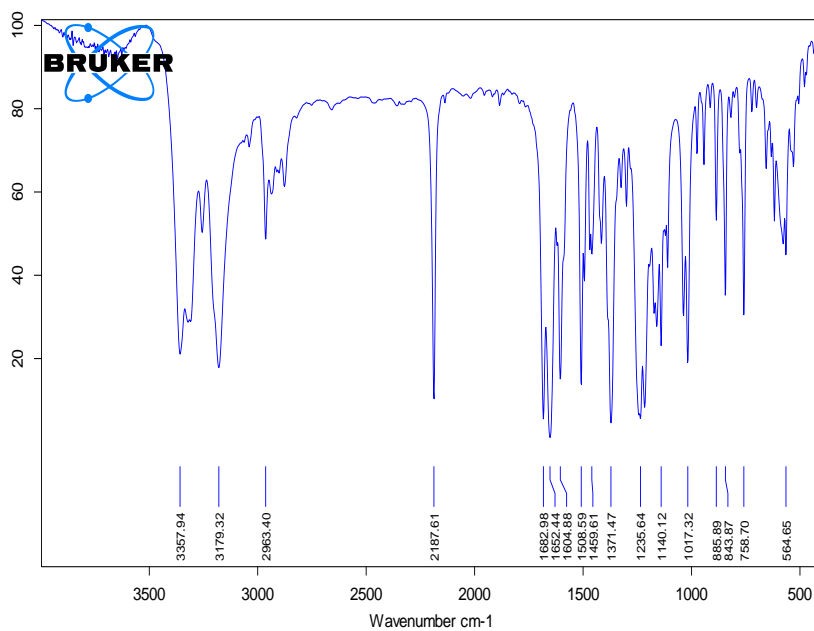

Figure S7. FT-IR spectrum of 2-amino-4-(4-((2-fluorobenzyl)oxy)phenyl)-7,7-dimethyl-5-oxo-5,6,7,8-tetrahydro-4H-chromene-3-carbonitrile(6b)

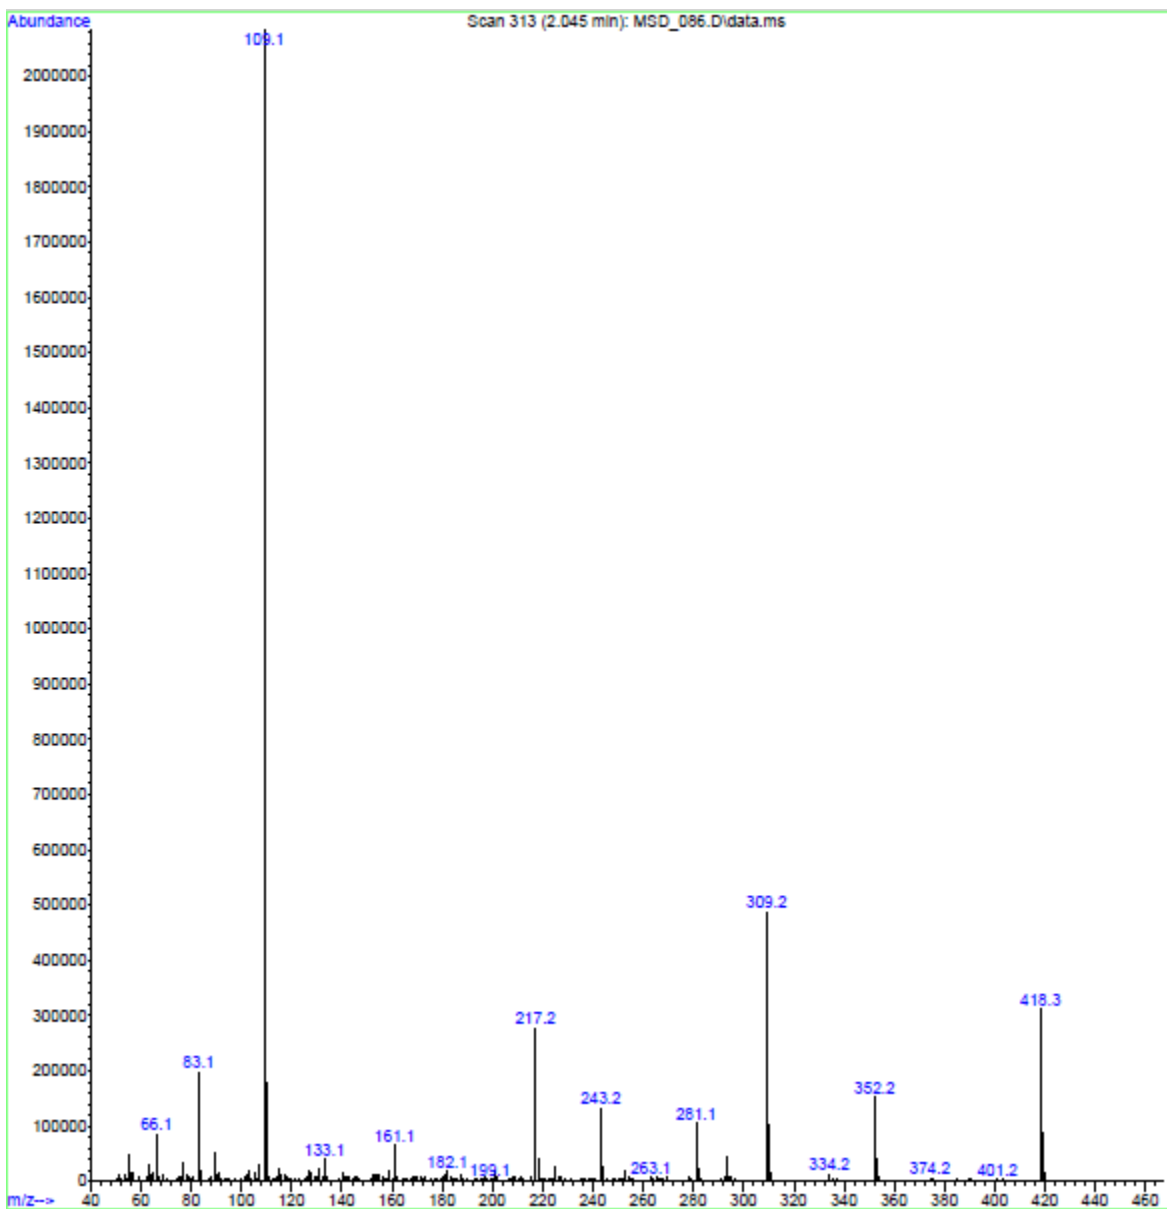

Figure S8. Mass spectrum of 2-amino-4-(4-((2-fluorobenzyl)oxy)phenyl)-7,7-dimethyl-5-oxo-5,6,7,8-tetrahydro-4H-chromene-3-carbonitrile(6b)

**C) spectra of compound 6c:**

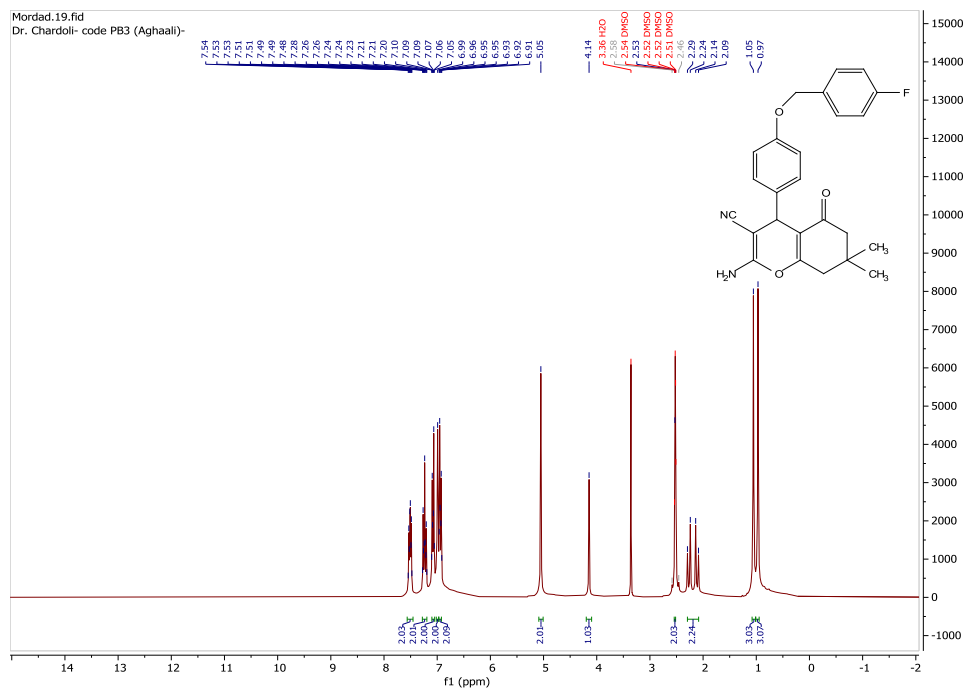

Figure S9.  $^1\text{H-NMR}$  spectrum of 2-amino-4-(4-((4-fluorobenzyl)oxy)phenyl)-7,7-dimethyl-5-oxo-5,6,7,8-tetrahydro-4H-chromene-3-carbonitrile(6c)

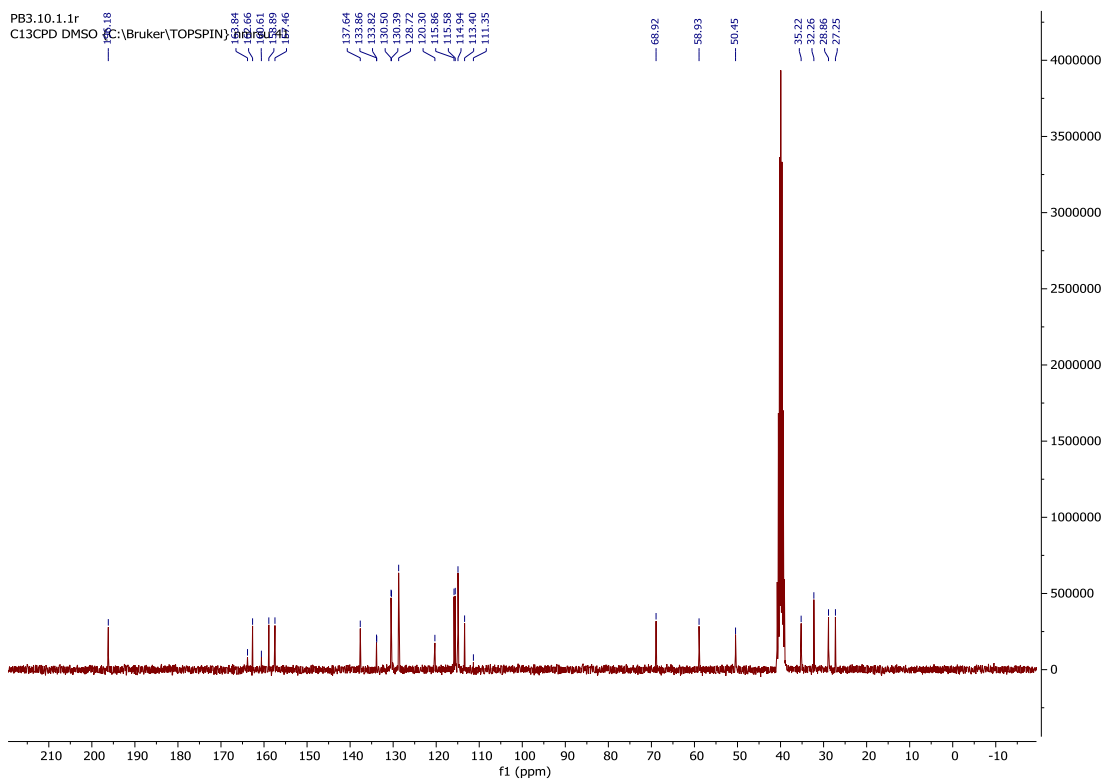

Figure S10.  $^{13}\text{C}$ -NMR spectrum of 2-amino-4-(4-((4-fluorobenzyl)oxy)phenyl)-7,7-dimethyl-5-oxo-5,6,7,8-tetrahydro-4H-chromene-3-carbonitrile(6c)

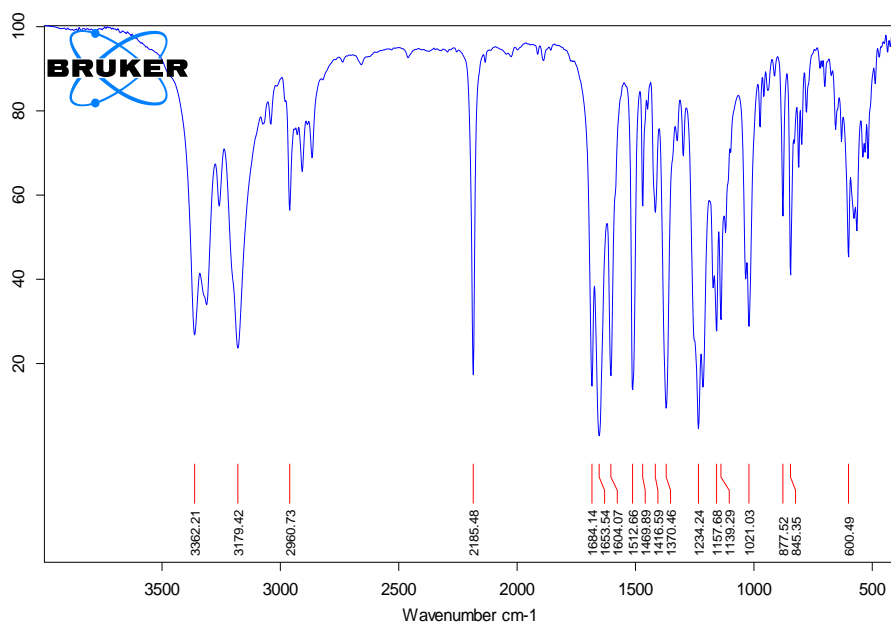

Figure S11. FT-IR spectrum of 2-amino-4-(4-((4-fluorobenzyl)oxy)phenyl)-7,7-dimethyl-5-oxo-5,6,7,8-tetrahydro-4H-chromene-3-carbonitrile(6c)



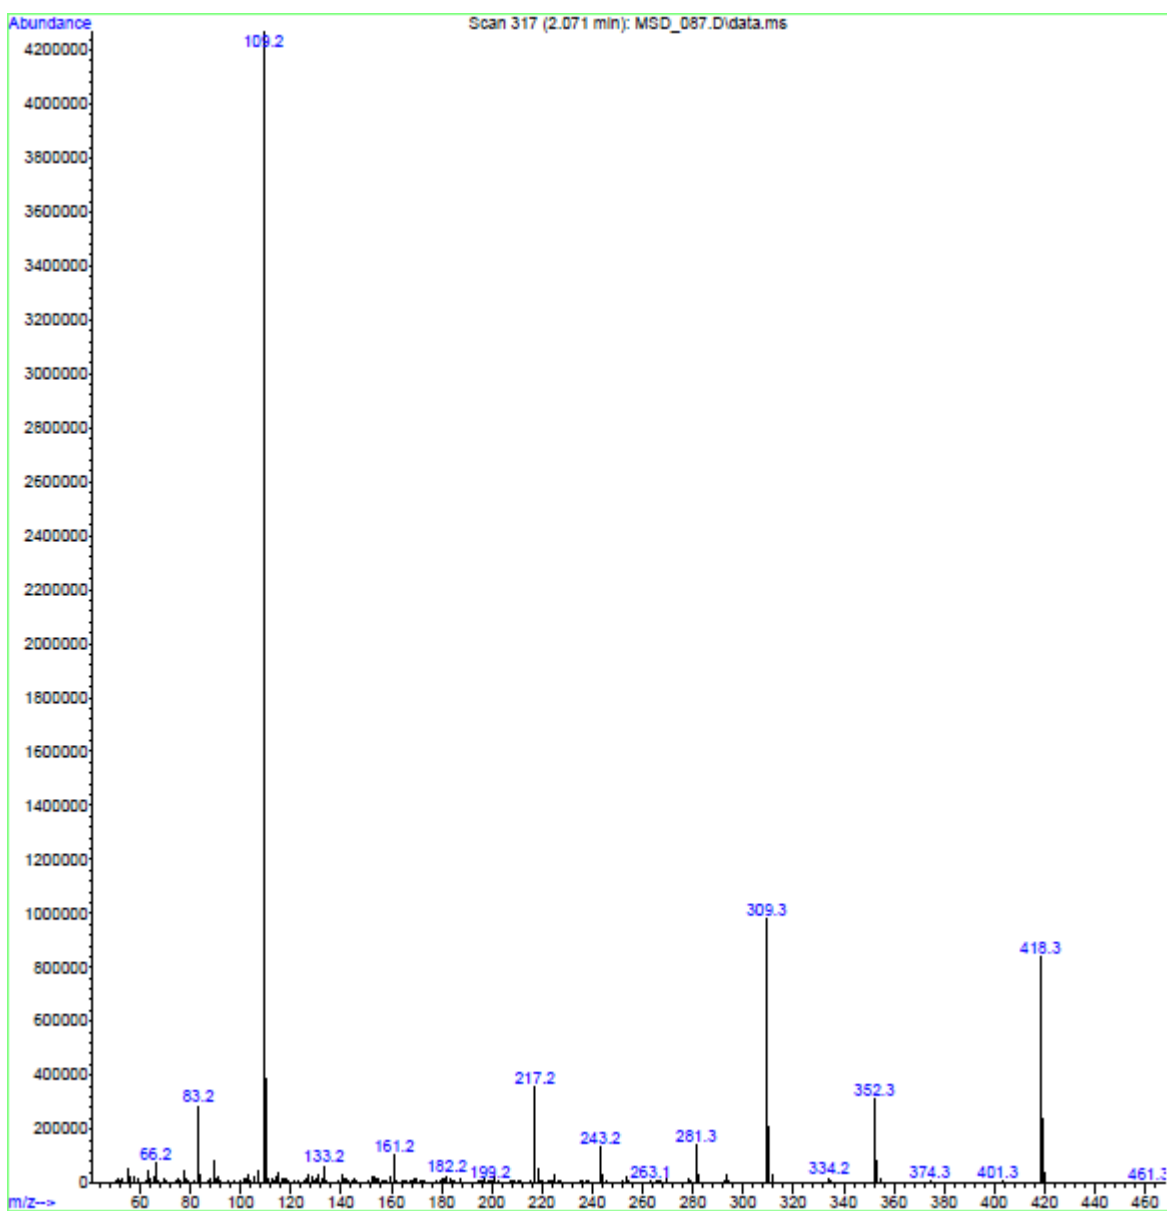

Figure S12. Mass spectrum of 2-amino-4-(4-((4-fluorobenzyl)oxy)phenyl)-7,7-dimethyl-5-oxo-5,6,7,8-tetrahydro-4H-chromene-3-carbonitrile(6c)

**D) spectrums of compound 6d:**

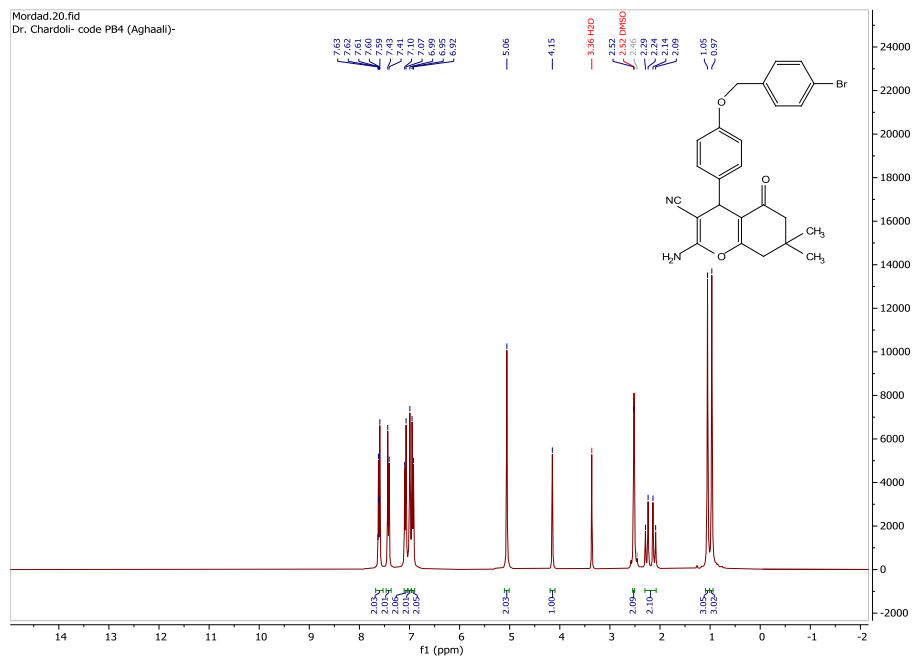

Figure S13. <sup>1</sup>H-NMR spectrum of 2-amino-4-(4-((4-bromobenzyl)oxy)phenyl)-7,7-dimethyl-5-oxo-5,6,7,8-tetrahydro-4H-chromene-3-carbonitrile(6d)

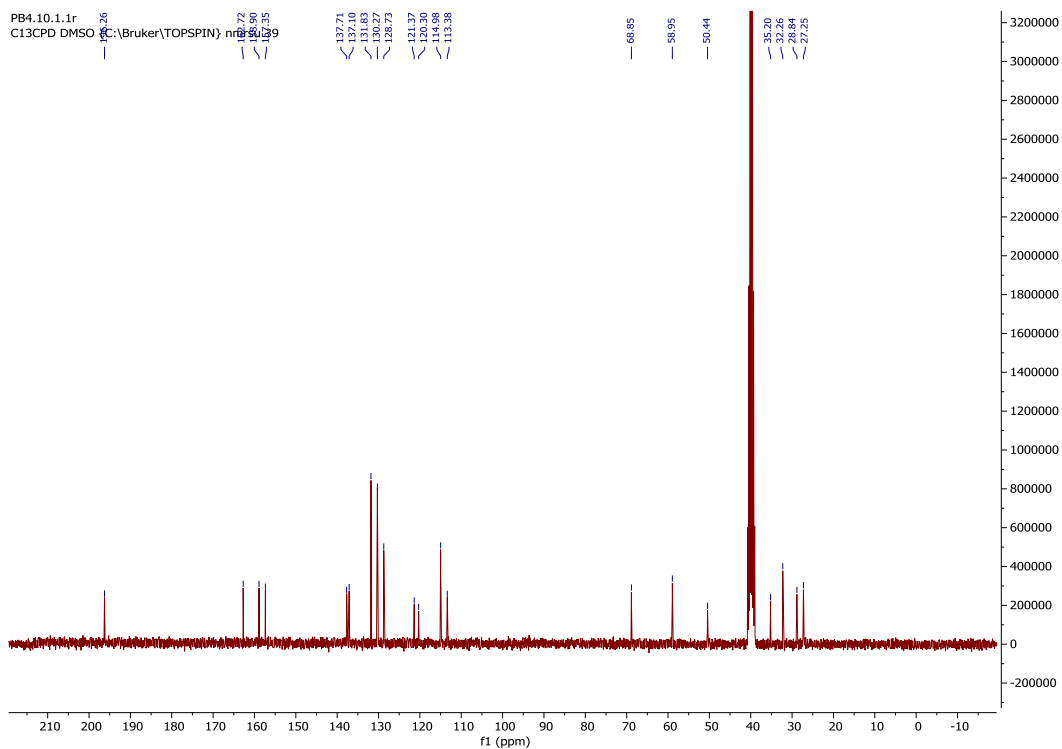

Figure S14.  $^{13}\text{C}$ -NMR spectrum of 2-amino-4-(4-((4-bromobenzyl)oxy)phenyl)-7,7-dimethyl-5-oxo-5,6,7,8-tetrahydro-4H-chromene-3-carbonitrile(6d)

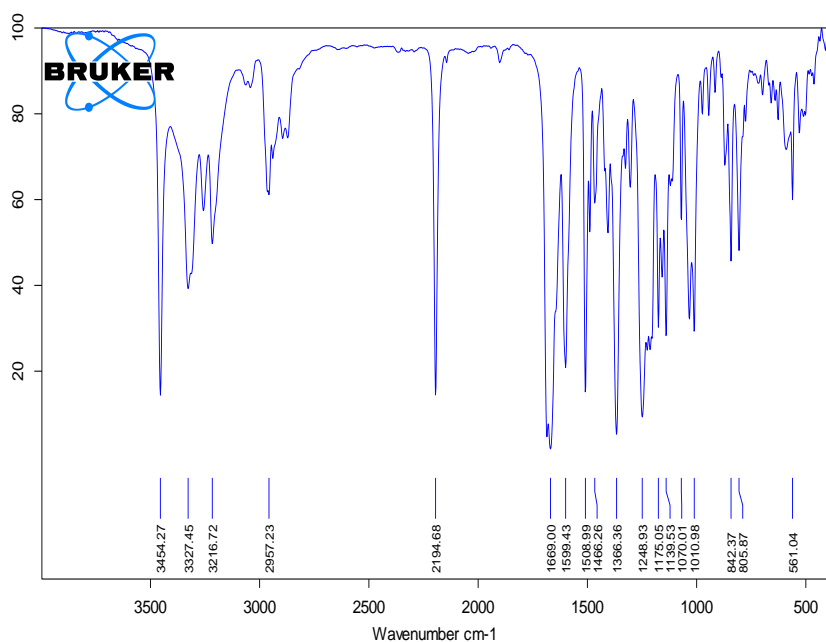

Figure S15. FT-IR spectrum of 2-amino-4-(4-((4-bromobenzyl)oxy)phenyl)-7,7-dimethyl-5-oxo-5,6,7,8-tetrahydro-4H-chromene-3-carbonitrile(6d)

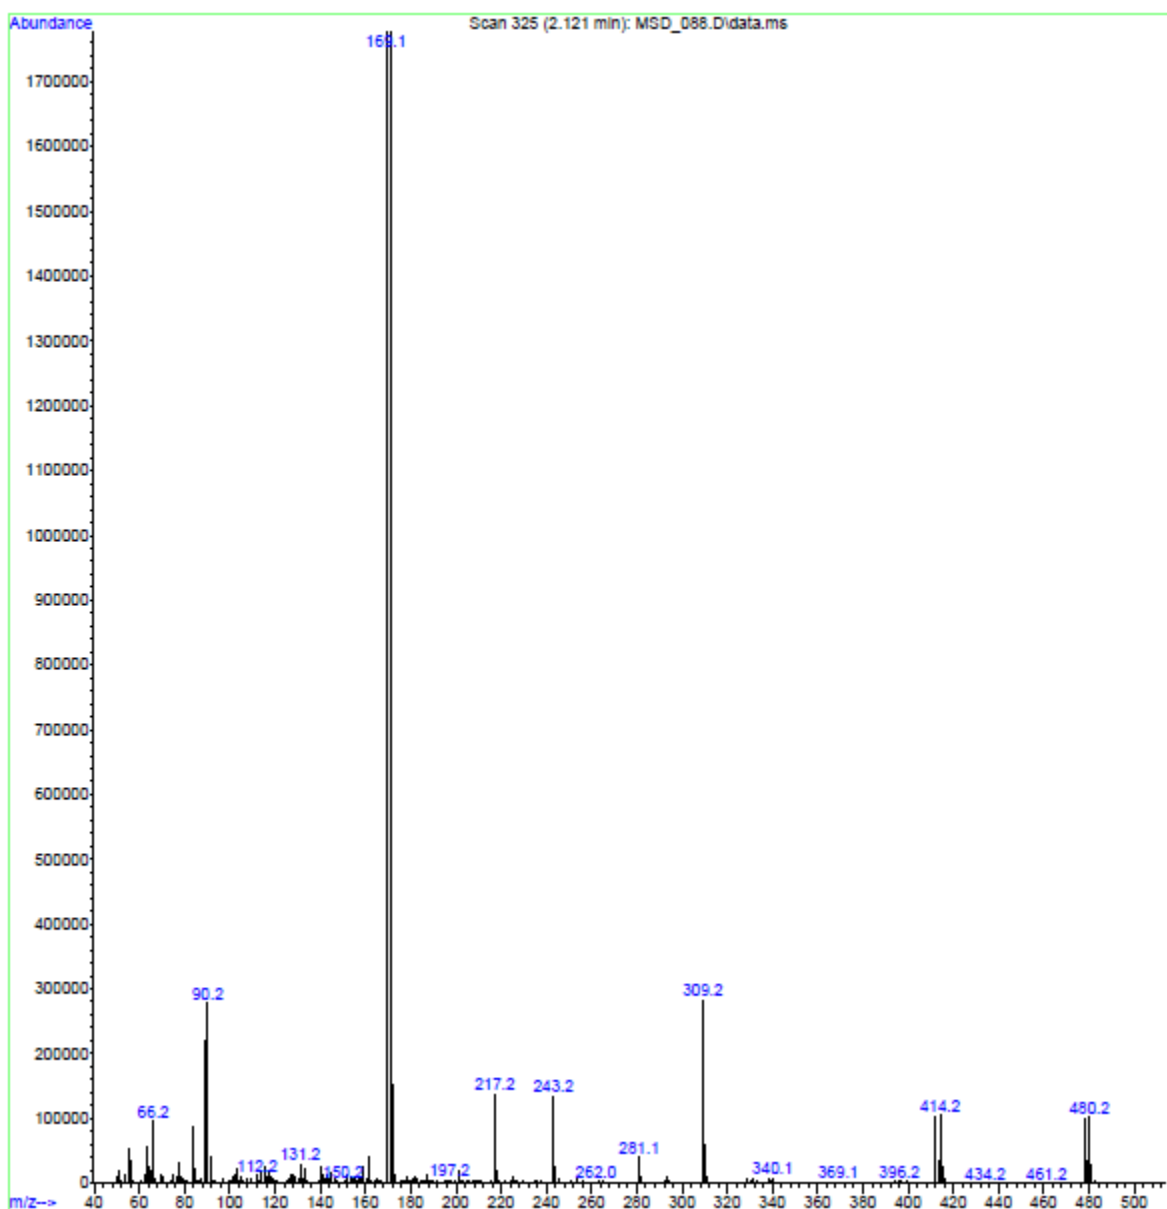

Figure S16. Mass spectrum of 2-amino-4-(4-((4-bromobenzyl)oxy)phenyl)-7,7-dimethyl-5-oxo-5,6,7,8-tetrahydro-4H-chromene-3-carbonitrile(6d)

*E) spectrums of compound 6e:*

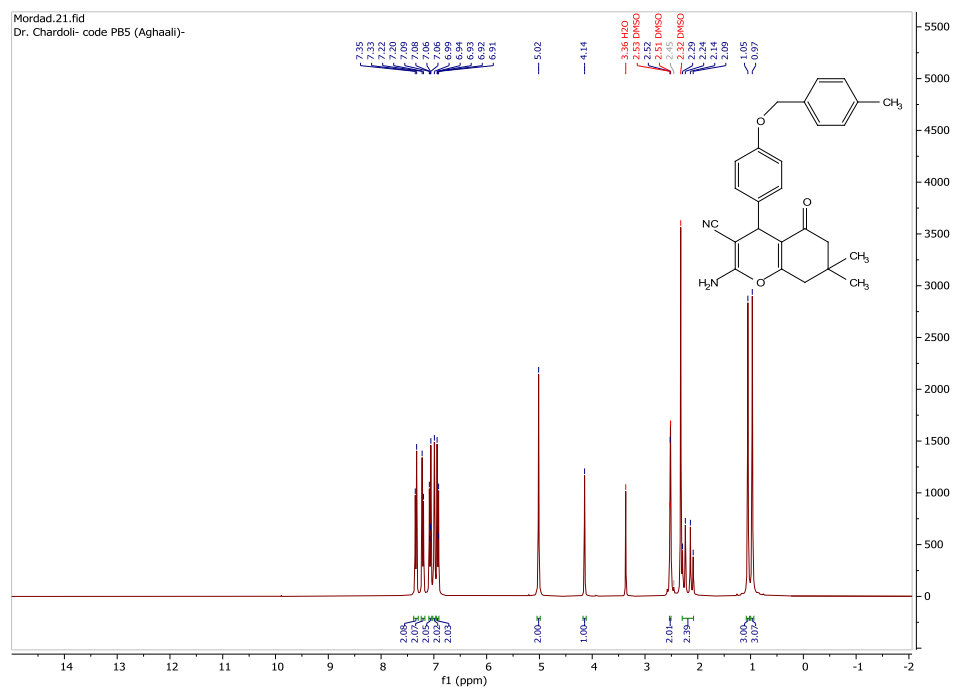

Figure S17.  $^1\text{H-NMR}$  spectrum of 2-amino-7,7-dimethyl-4-(4-(4-methylbenzyl)oxy)phenyl)-5-oxo-5,6,7,8-tetrahydro-4H-chromene-3-carbonitrile(6e)

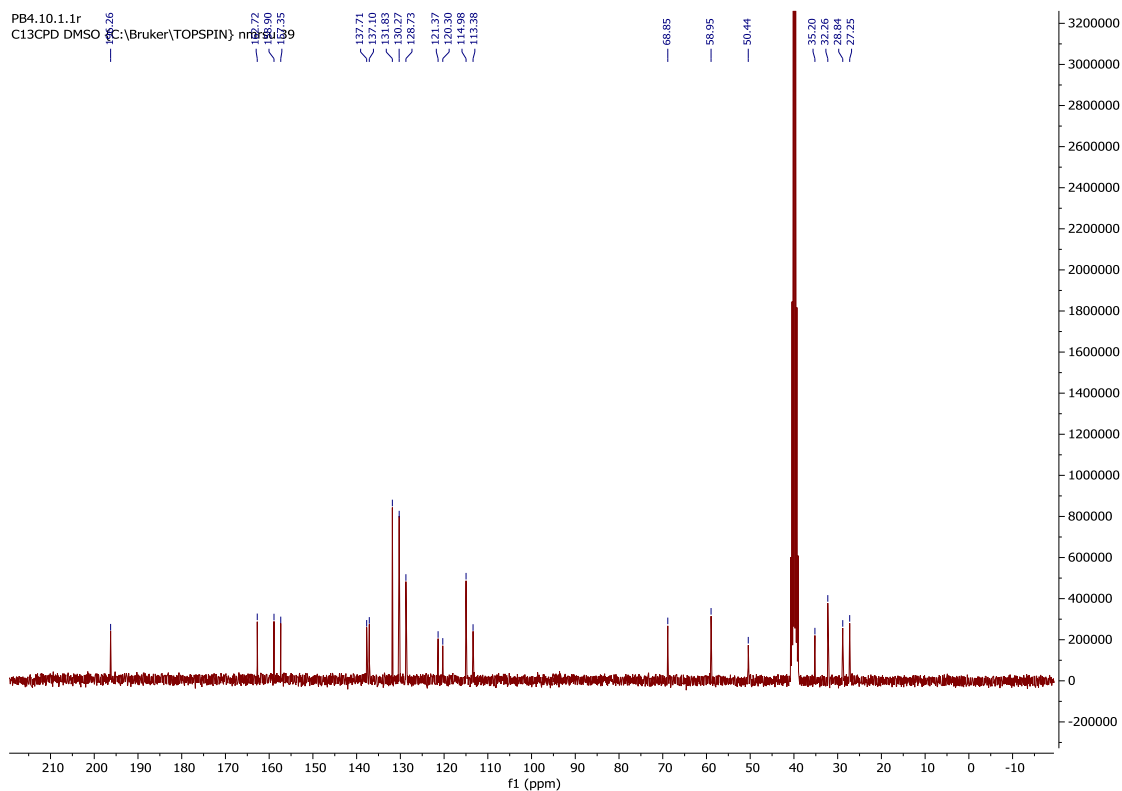

Figure S18.  $^{13}\text{C}$ -NMR spectrum of 2-amino-7,7-dimethyl-4-(4-((4-methylbenzyl)oxy)phenyl)-5-oxo-5,6,7,8-tetrahydro-4H-chromene-3-carbonitrile(6e)

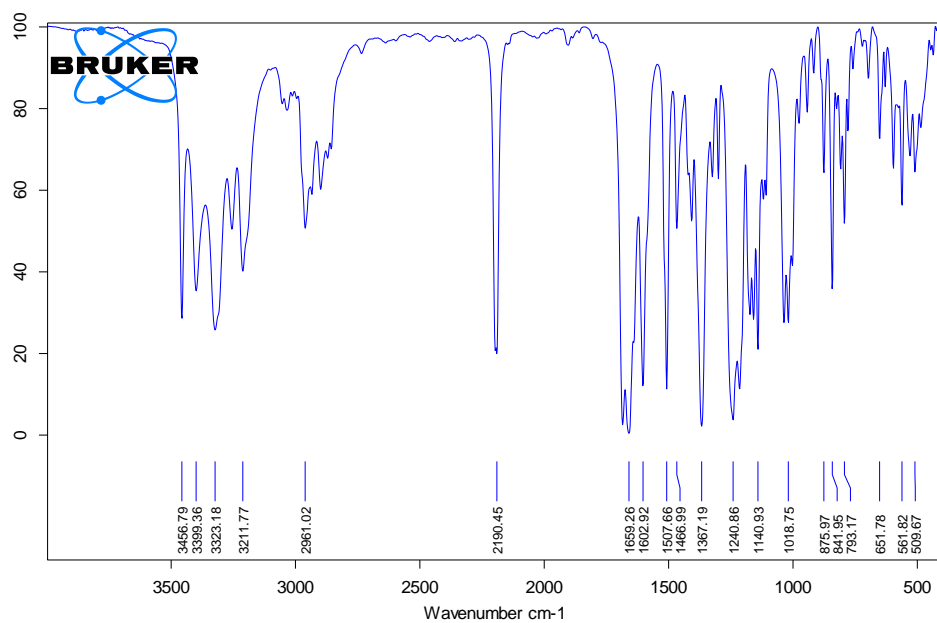

Figure S19. FT-IR spectrum of 2-amino-7,7-dimethyl-4-(4-((4-methylbenzyl)oxy)phenyl)-5-oxo-5,6,7,8-tetrahydro-4H-chromene-3-carbonitrile(6e)

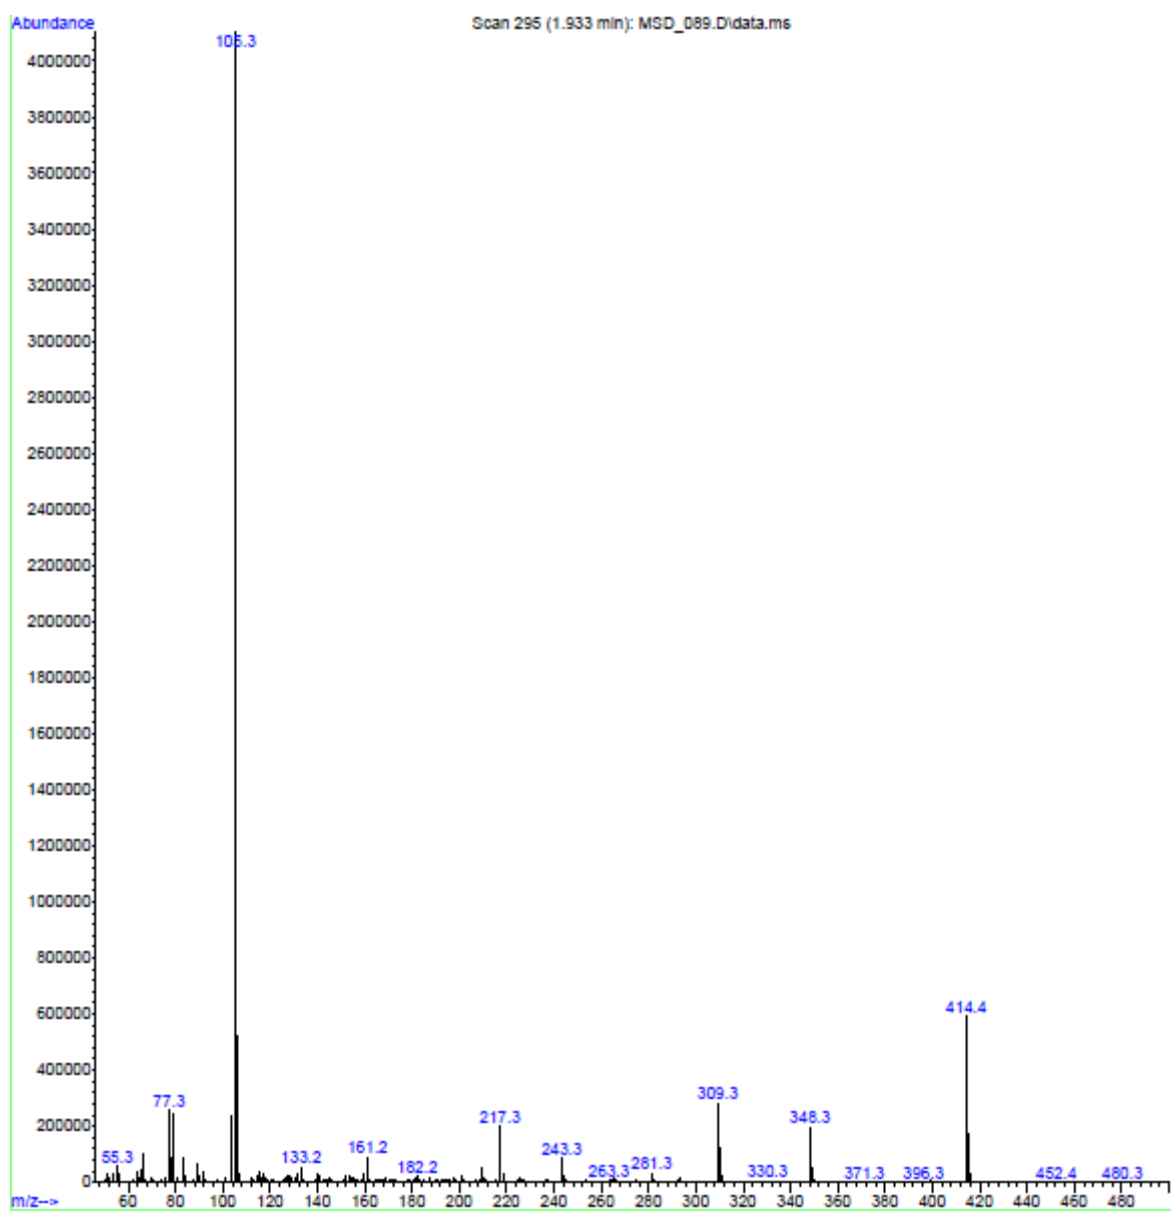

Figure S20. Mass spectrum of 2-amino-7,7-dimethyl-4-(4-((4-methylbenzyl)oxy)phenyl)-5-oxo-5,6,7,8-tetrahydro-4H-chromene-3-carbonitrile(6e)

**F) spectrums of compound 6f:**

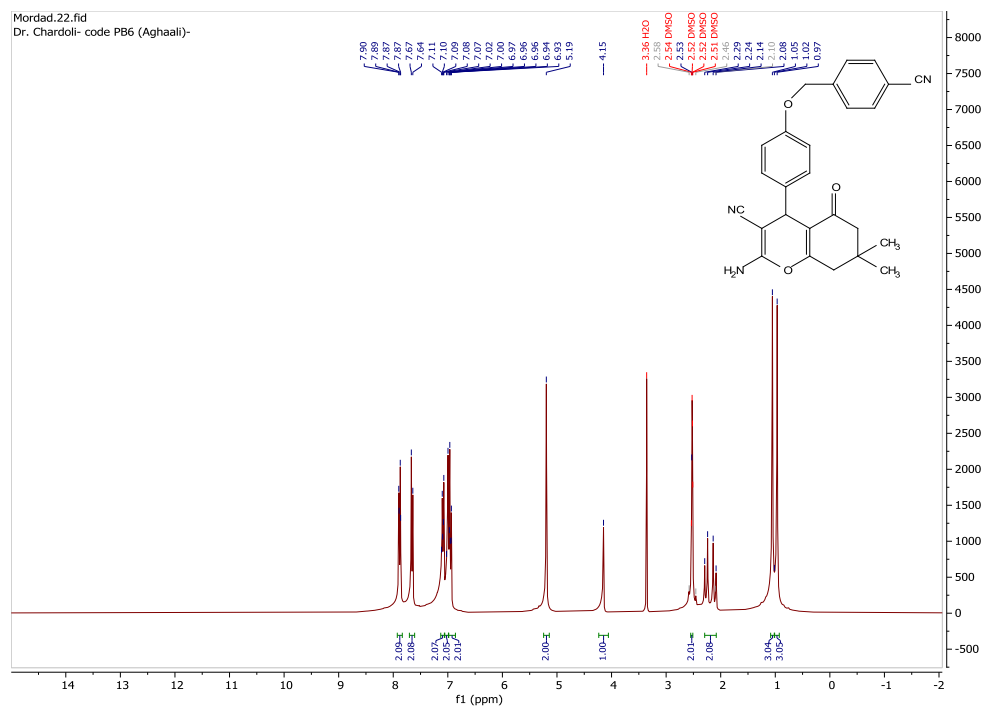

Figure S21. <sup>1</sup>H-NMR spectrum of 2-amino-4-(4-((4-cyanobenzyl)oxy)phenyl)-7,7-dimethyl-5-oxo-5,6,7,8-tetrahydro-4H-chromene-3-carbonitrile(6f)



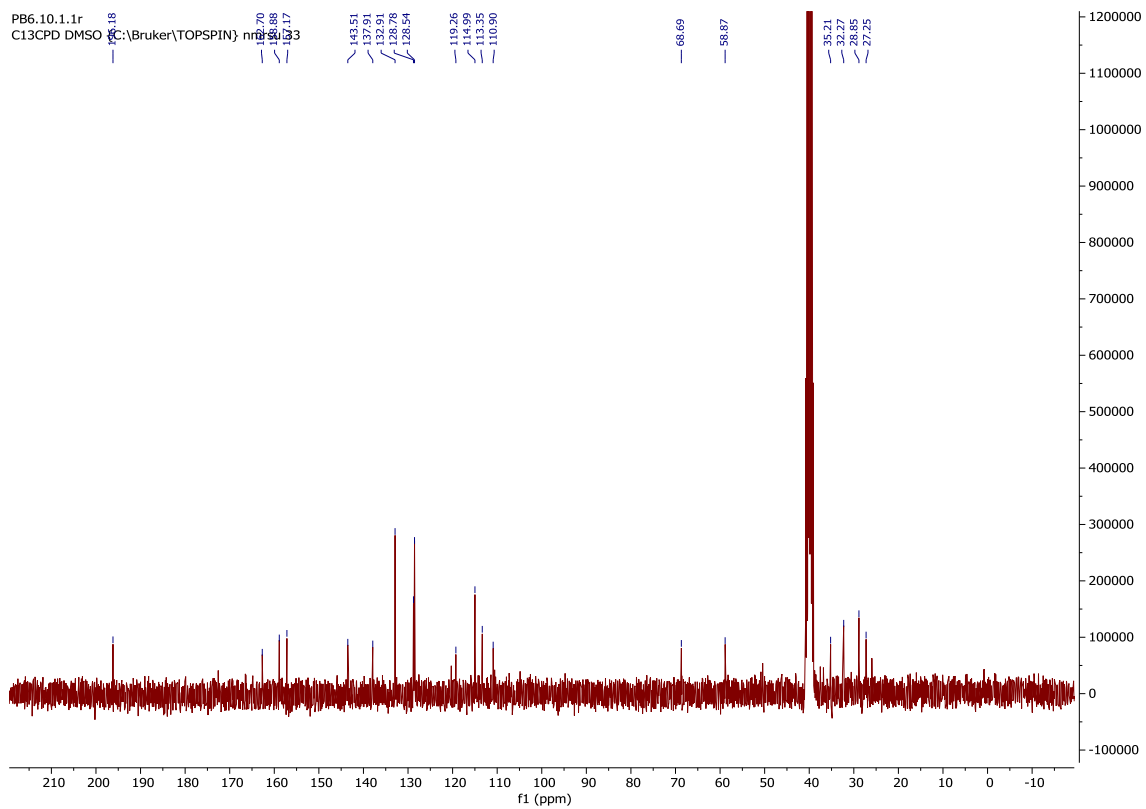

Figure S22.  $^{13}\text{C}$ -NMR spectrum of 2-amino-4-(4-((4-cyanobenzyl)oxy)phenyl)-7,7-dimethyl-5-oxo-5,6,7,8-tetrahydro-4H-chromene-3-carbonitrile(6f)

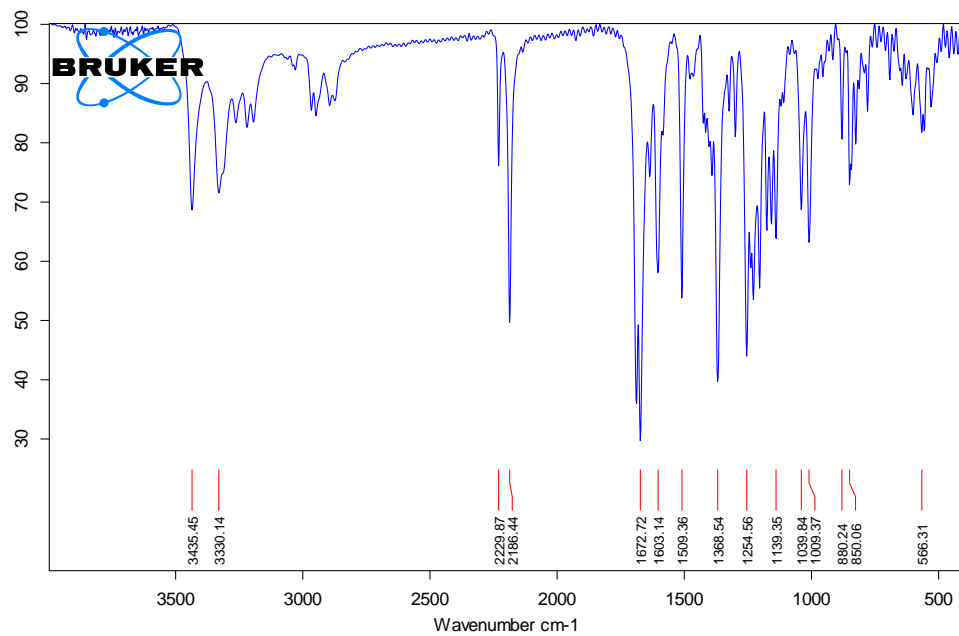

Figure S23. FT-IR spectrum of 2-amino-4-(4-((4-cyanobenzyl)oxy)phenyl)-7,7-dimethyl-5-oxo-5,6,7,8-tetrahydro-4H-chromene-3-carbonitrile(6f)

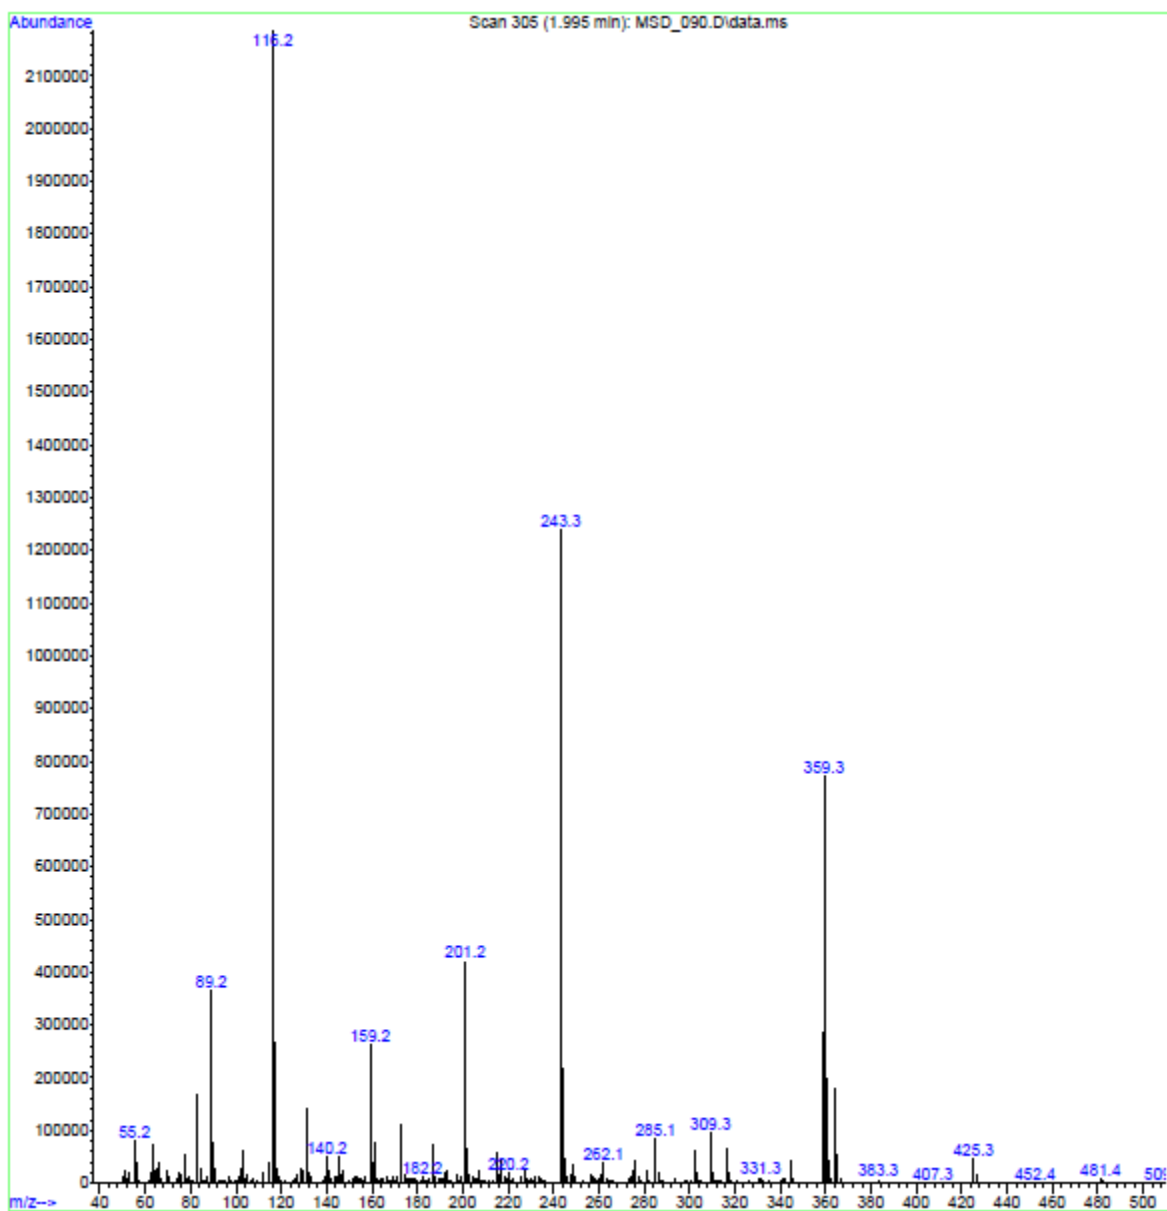

Figure S24. Mass spectrum of 2-amino-4-(4-((4-cyanobenzyl)oxy)phenyl)-7,7-dimethyl-5-oxo-5,6,7,8-tetrahydro-4H-chromene-3-carbonitrile(6f)

G) spectra of compound 6g:

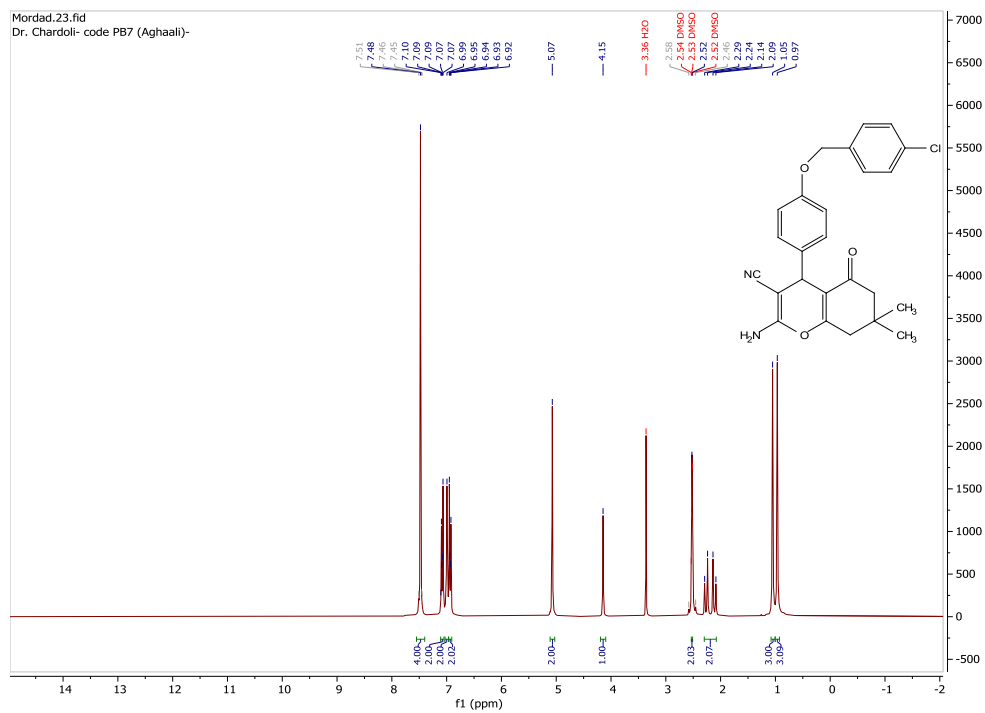

Figure S25. <sup>1</sup>H-NMR spectrum of 2-amino-4-(4-((4-chlorobenzyl)oxy)phenyl)-7,7-dimethyl-5-oxo-5,6,7,8-tetrahydro-4H-chromene-3-carbonitrile(6g)

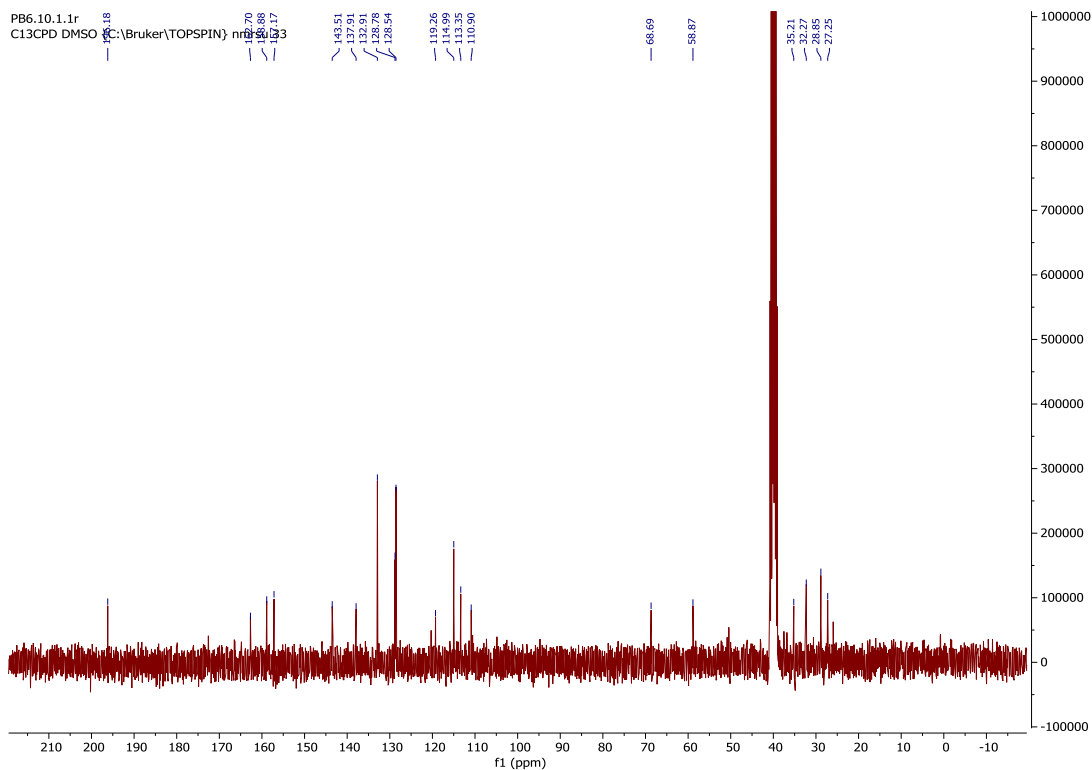

Figure S26.  $^{13}\text{C}$ -NMR spectrum of 2-amino-4-(4-((4-chlorobenzyl)oxy)phenyl)-7,7-dimethyl-5-oxo-5,6,7,8-tetrahydro-4H-chromene-3-carbonitrile(6g)

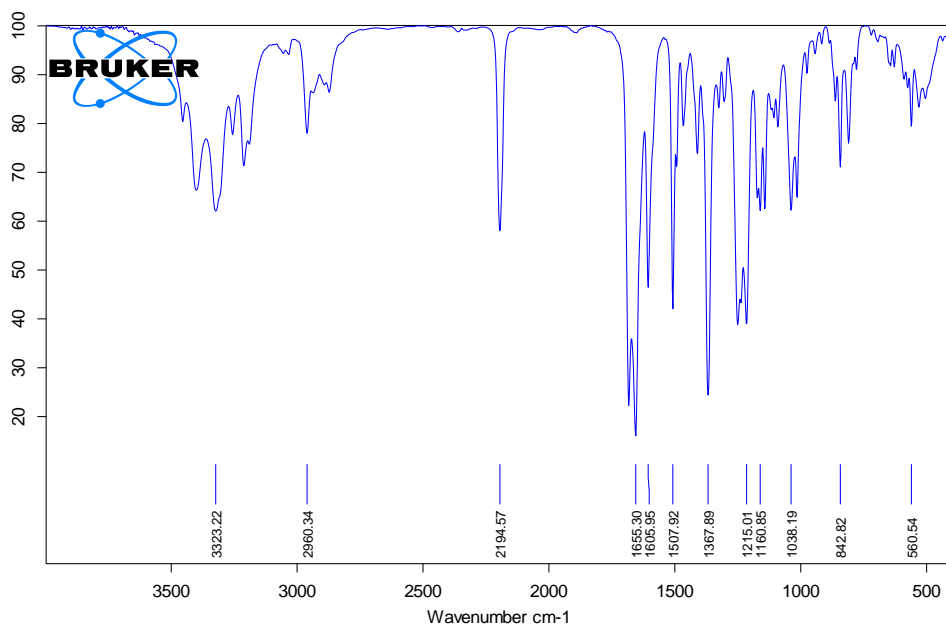

Figure S27. FT-IR spectrum of 2-amino-4-(4-((4-chlorobenzyl)oxy)phenyl)-7,7-dimethyl-5-oxo-5,6,7,8-tetrahydro-4H-chromene-3-carbonitrile(6g)

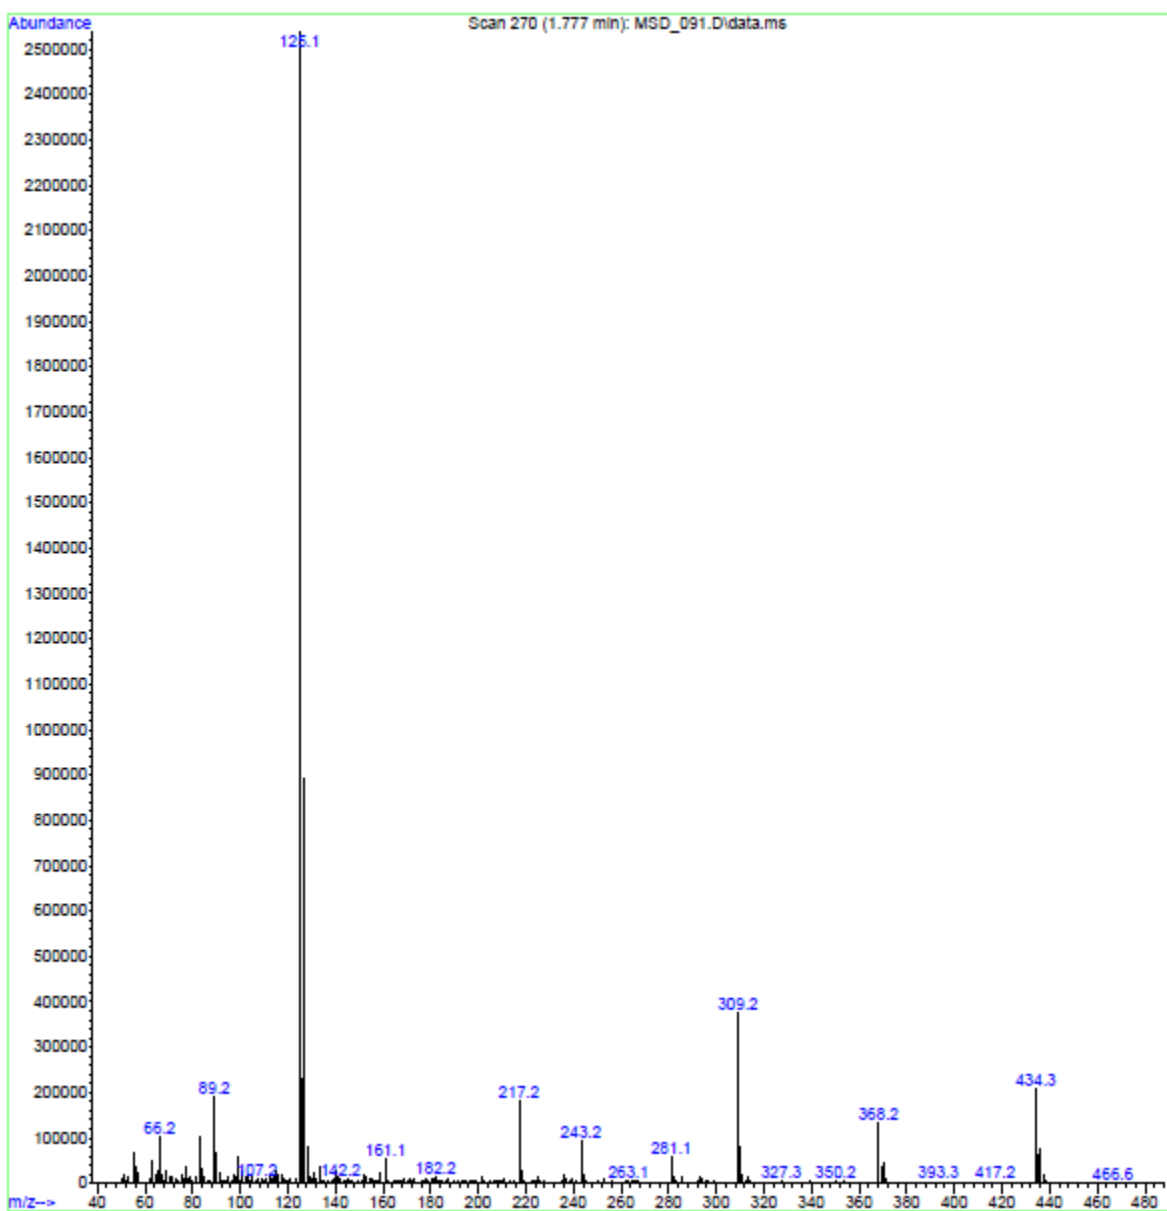

Figure S28. Mass spectrum of 2-amino-4-(4-((4-chlorobenzyl)oxy)phenyl)-7,7-dimethyl-5-oxo-5,6,7,8-tetrahydro-4H-chromene-3-carbonitrile(6g)

**H) spectrums of compound 6h:**

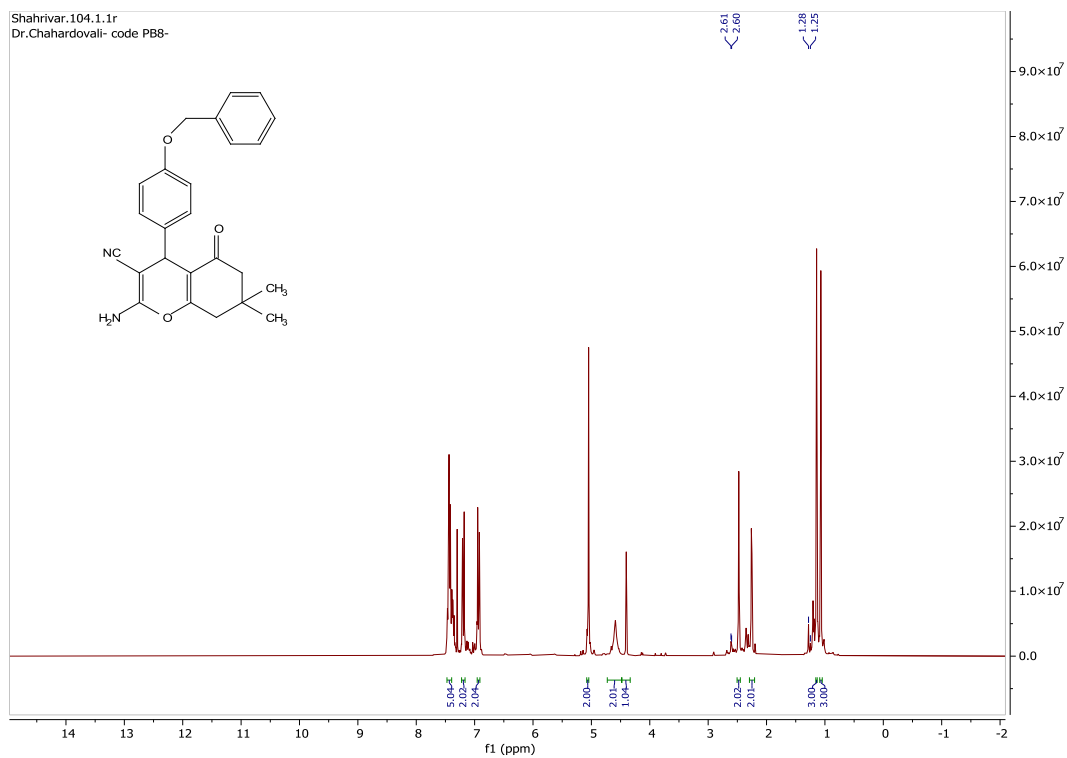

*Figure S29. <sup>1</sup>H-NMR spectrum of 2-amino-4-(4-(benzyloxy)phenyl)-7,7-dimethyl-5-oxo-5,6,7,8-tetrahydro-4H-chromene-3-carbonitrile(6h)*

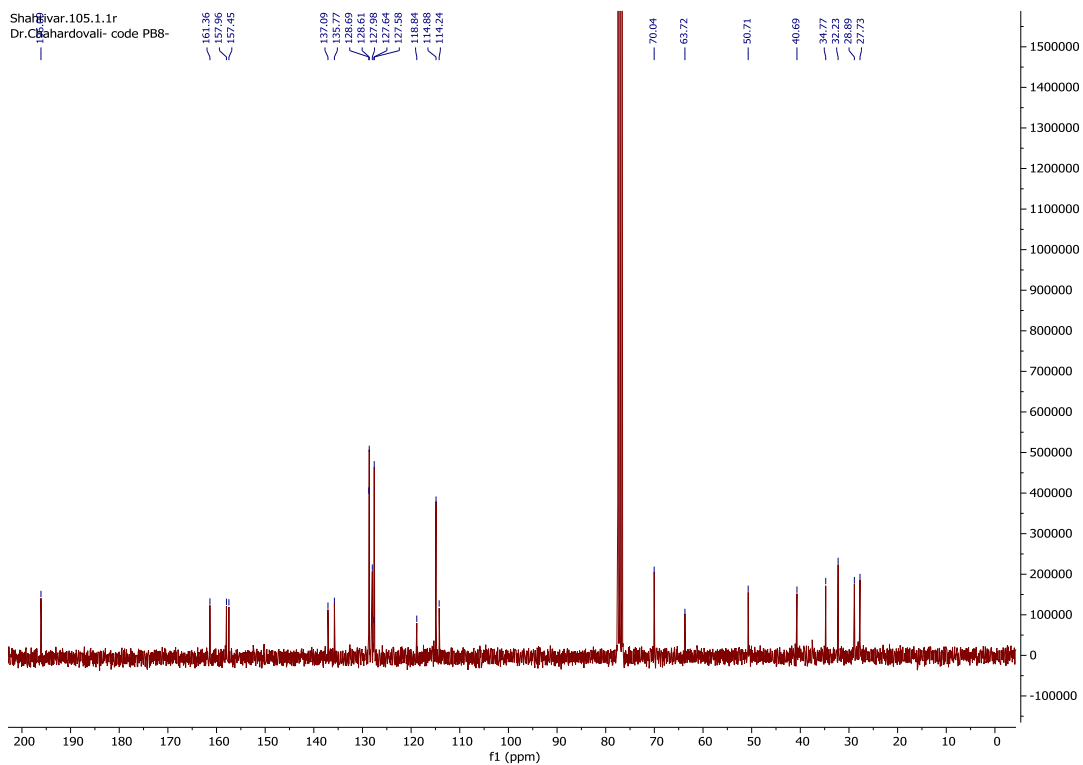

Figure S30.  $^{13}\text{C}$ -NMR spectrum of 2-amino-4-(4-(benzyloxy)phenyl)-7,7-dimethyl-5-oxo-5,6,7,8-tetrahydro-4H-chromene-3-carbonitrile(6h)



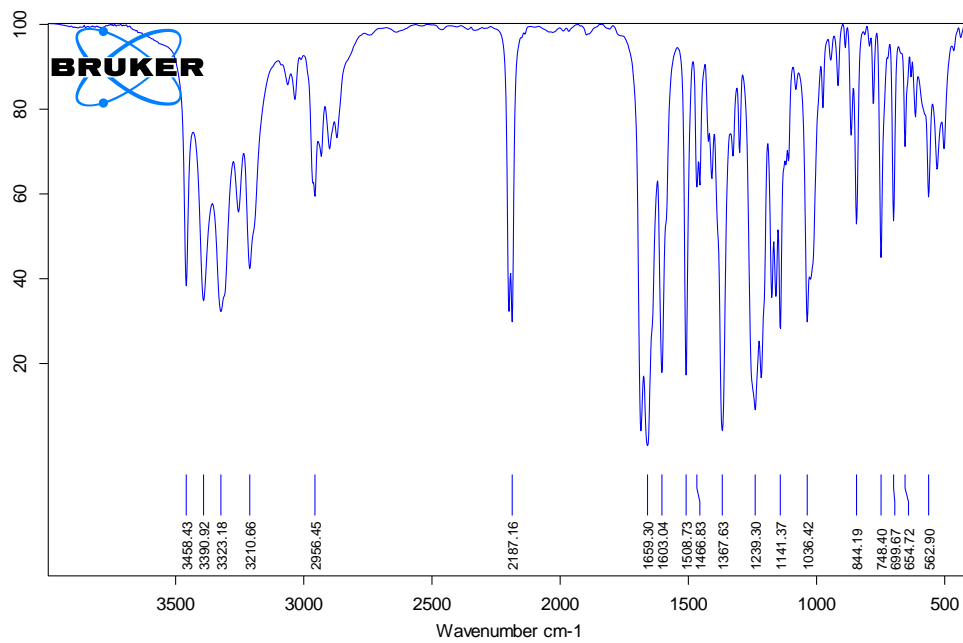

Figure S31. FT-IR spectrum of 2-amino-4-(4-(benzyloxy)phenyl)-7,7-dimethyl-5-oxo-5,6,7,8-tetrahydro-4H-chromene-3-carbonitrile(6h)

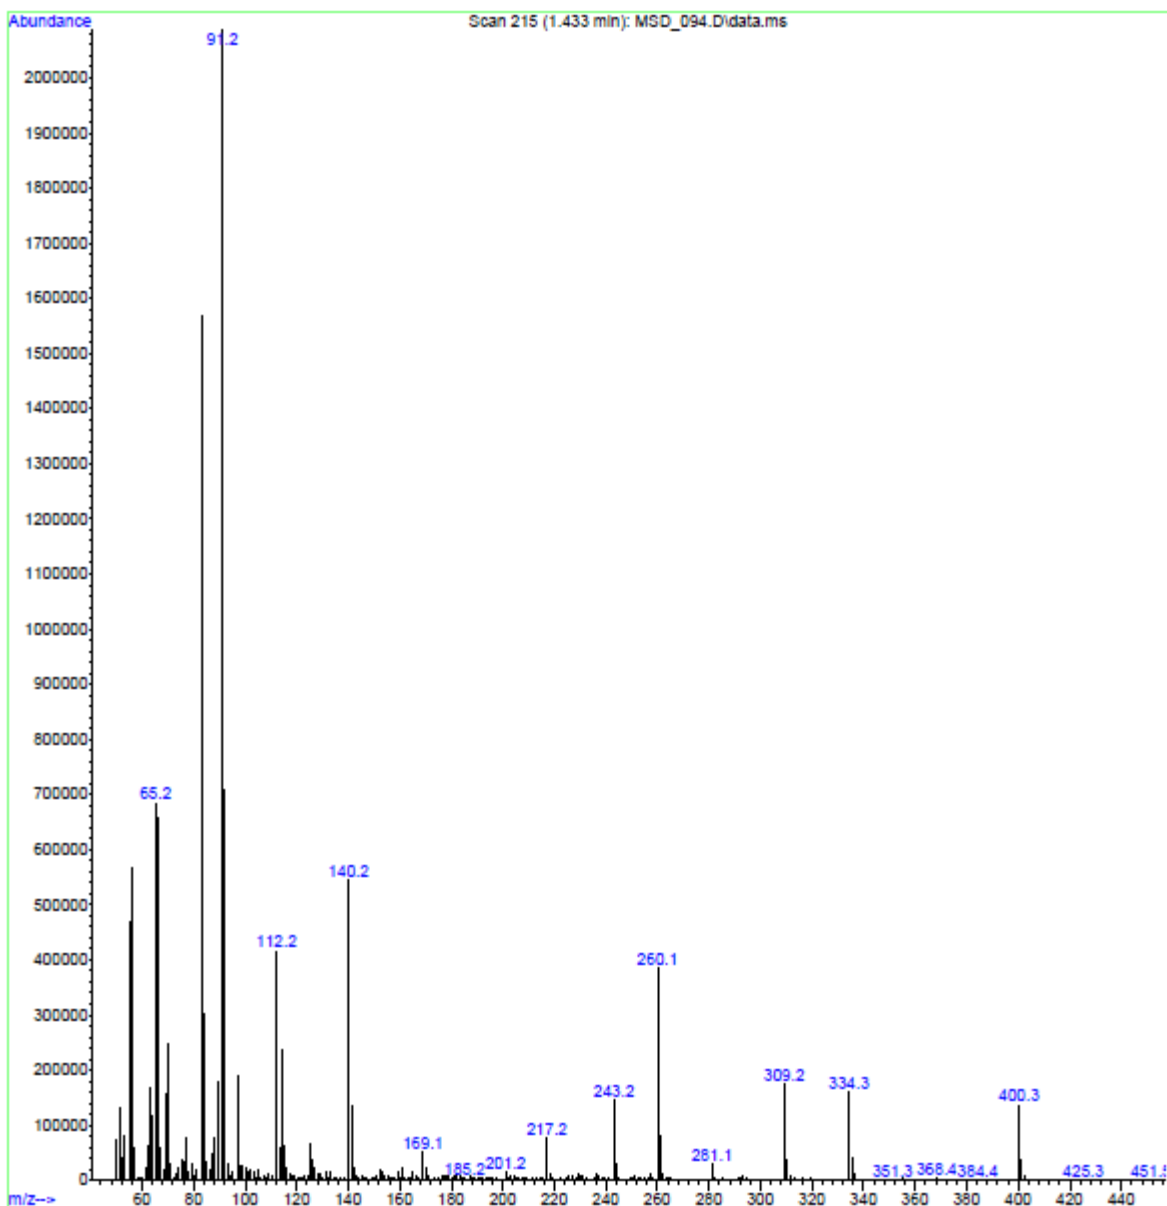

Figure S32. Mass spectrum of 2-amino-4-(4-(benzyloxy)phenyl)-7,7-dimethyl-5-oxo-5,6,7,8-tetrahydro-4H-chromene-3-carbonitrile(6h)



Figure S34.  $^{13}\text{C}$ -NMR spectrum of 2-amino-4-(4-((3-fluorobenzyl)oxy)-3-methoxyphenyl)-7,7-dimethyl-5-oxo-5,6,7,8-tetrahydro-4H-chromene-3-carbonitrile(6i)

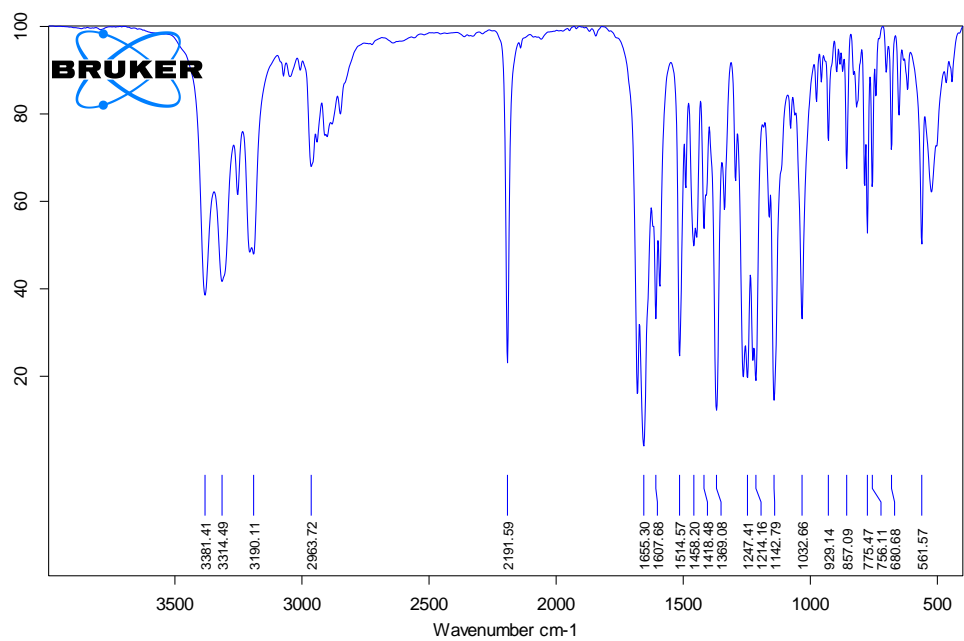

Figure S35. FT-IR spectrum of 2-amino-4-(4-((3-fluorobenzyl)oxy)-3-methoxyphenyl)-7,7-dimethyl-5-oxo-5,6,7,8-tetrahydro-4H-chromene-3-carbonitrile(6i)

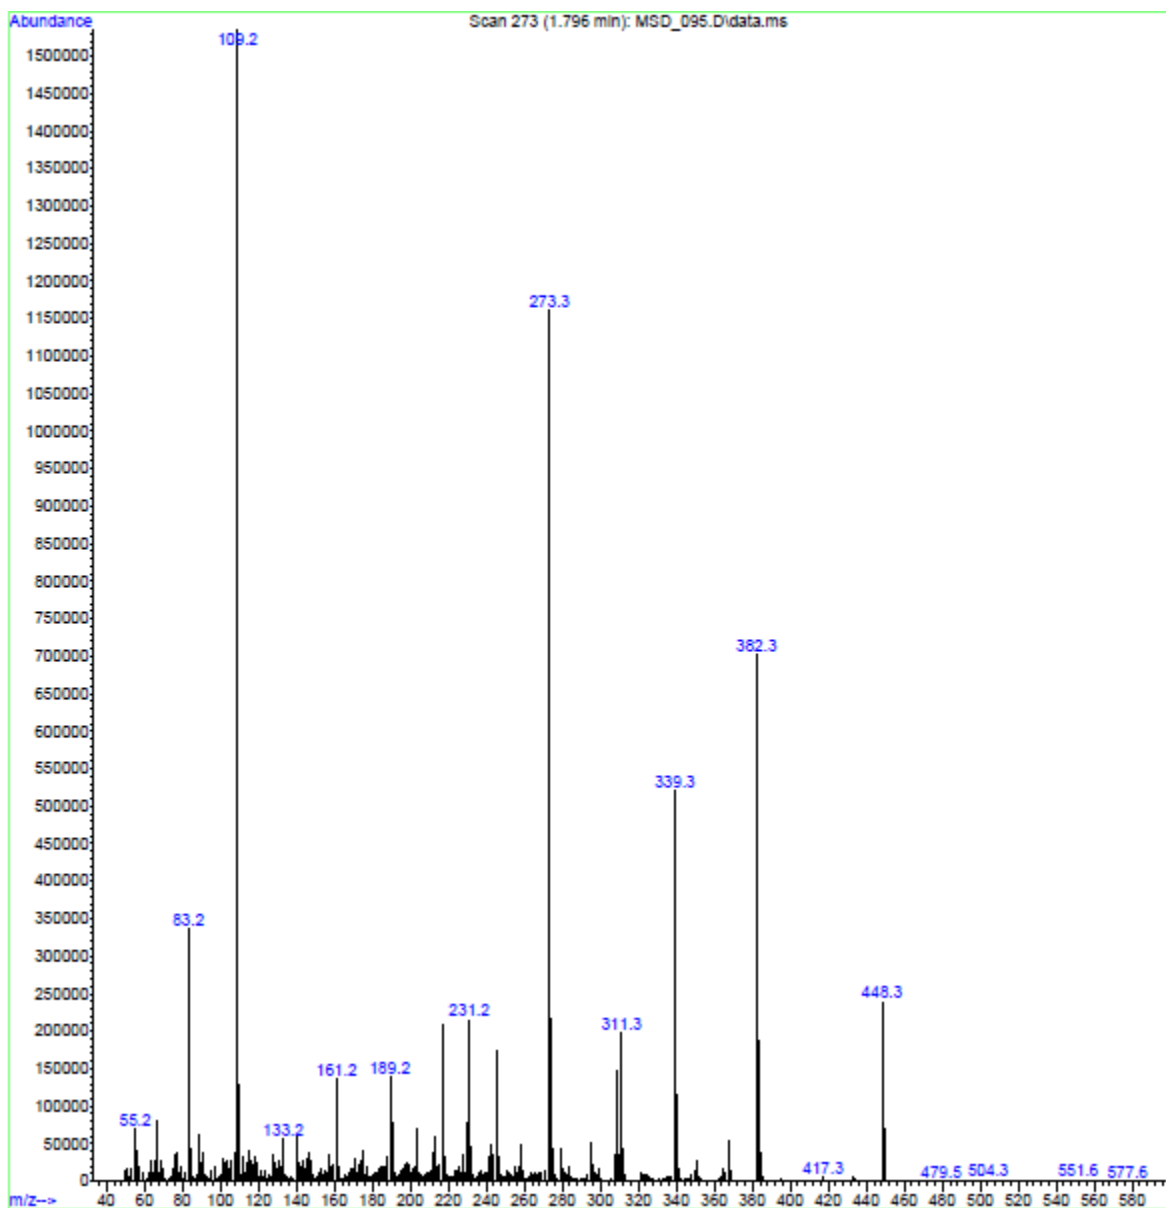

Figure S36. Mass spectrum of 2-amino-4-(4-((3-fluorobenzyl)oxy)-3-methoxyphenyl)-7,7-dimethyl-5-oxo-5,6,7,8-tetrahydro-4H-chromene-3-carbonitrile(6i)

**J) spectra of compound 6j:**

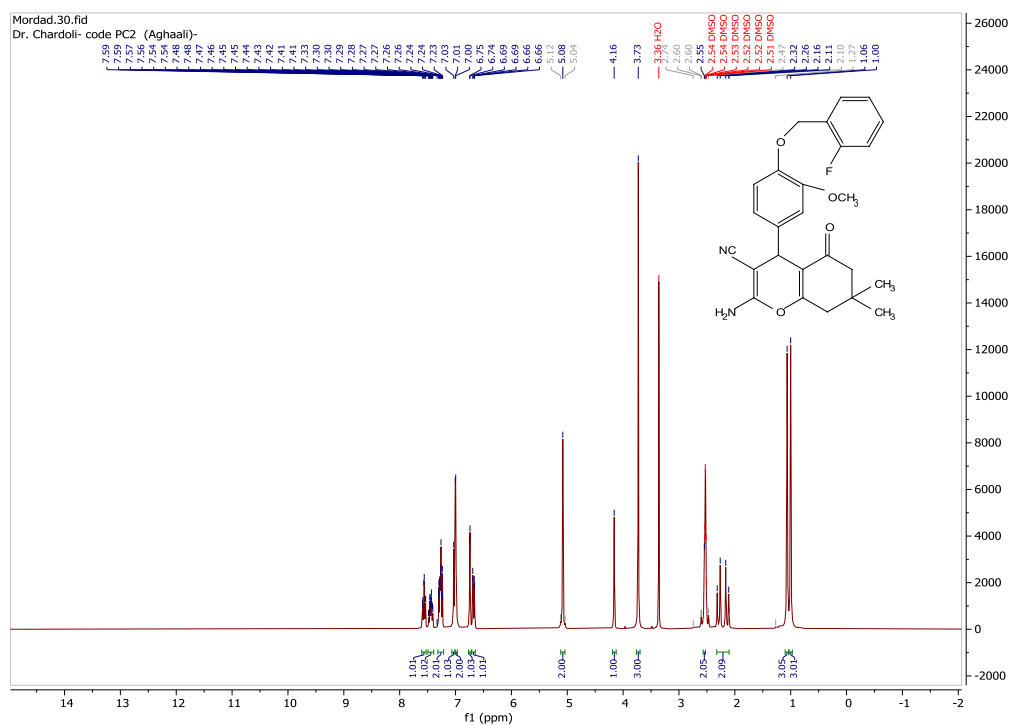

Figure S37. <sup>1</sup>H-NMR spectrum of 2-amino-4-(4-((2-fluorobenzyl)oxy)-3-methoxyphenyl)-7,7-dimethyl-5-oxo-5,6,7,8-tetrahydro-4H-chromene-3-carbonitrile(6j)

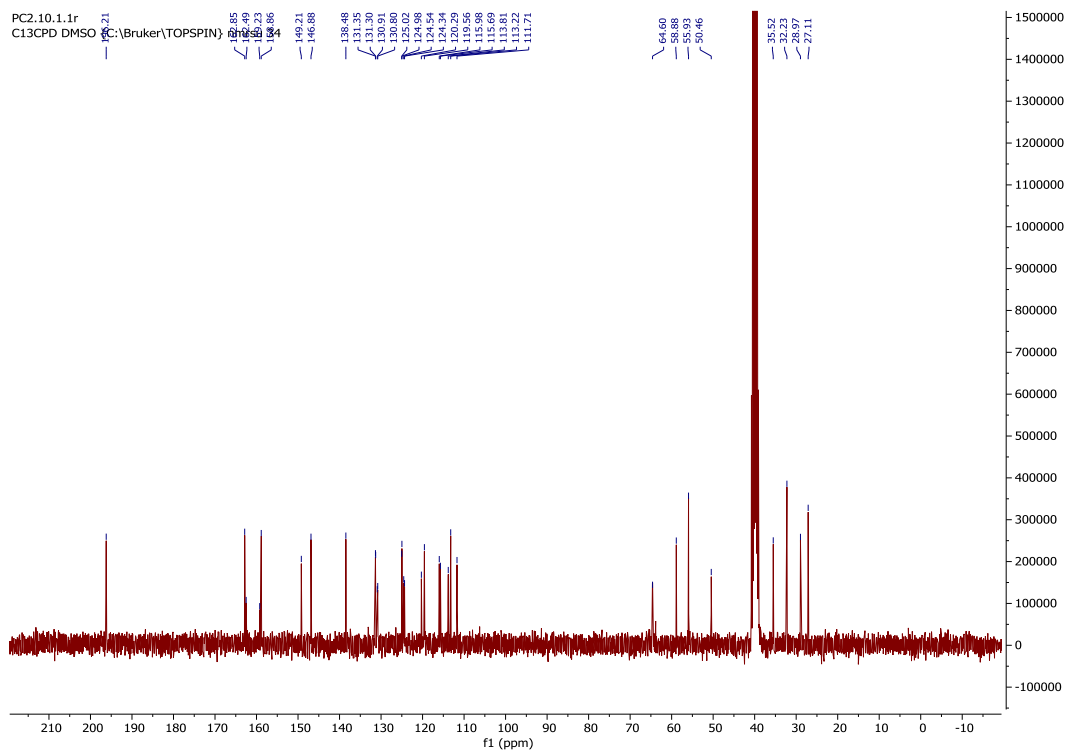

Figure S38.  $^{13}\text{C}$ -NMR spectrum of 2-amino-4-(4-((2-fluorobenzyl)oxy)-3-methoxyphenyl)-7,7-dimethyl-5-oxo-5,6,7,8-tetrahydro-4H-chromene-3-carbonitrile(6j)

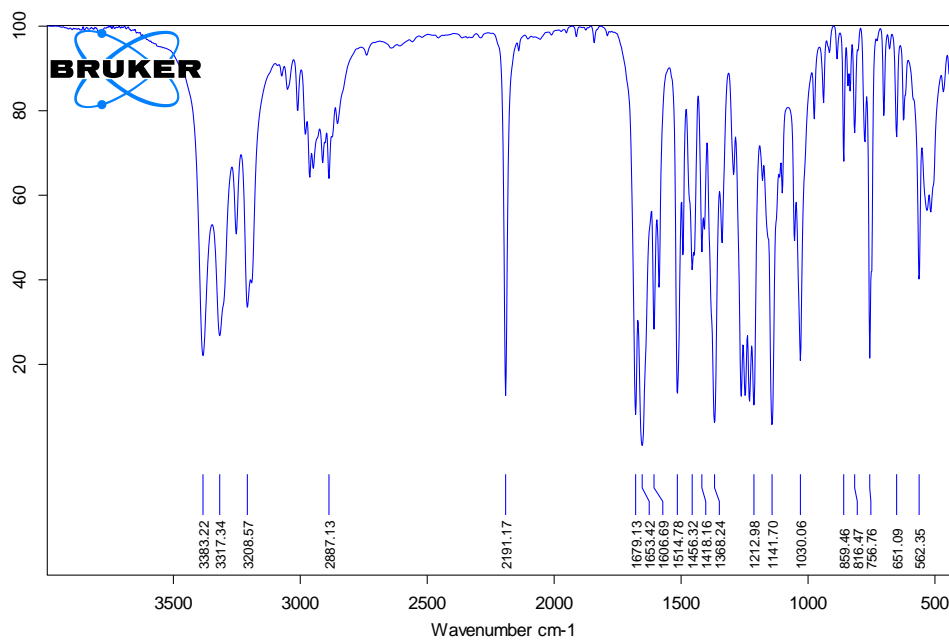

Figure S39. FT-IR spectrum of 2-amino-4-(4-((2-fluorobenzyl)oxy)-3-methoxyphenyl)-7,7-dimethyl-5-oxo-5,6,7,8-tetrahydro-4H-chromene-3-carbonitrile(6j)

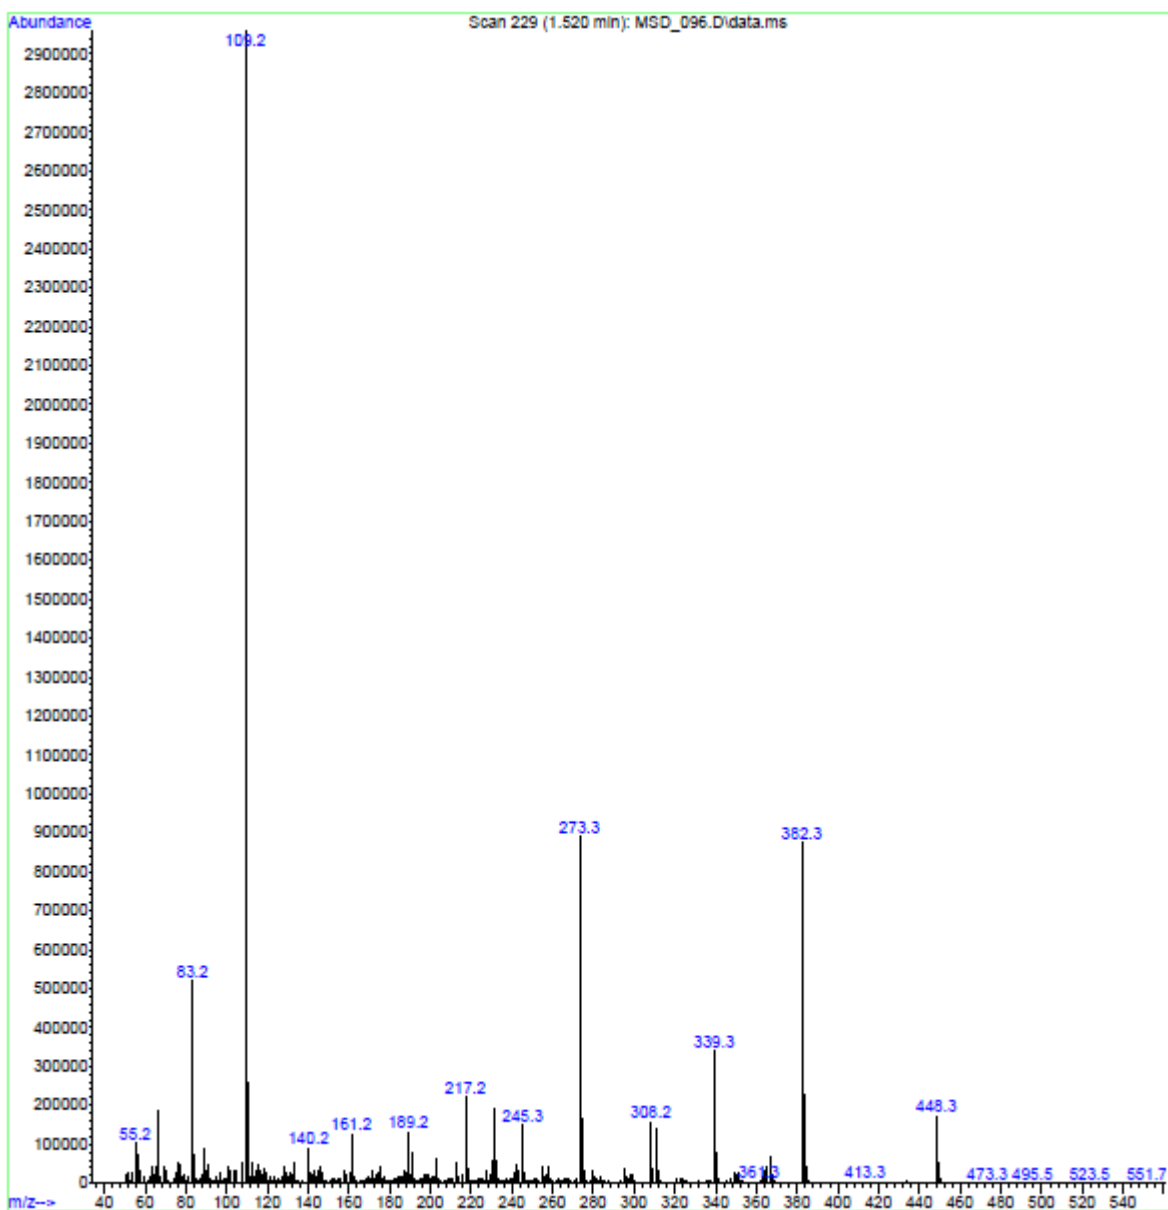

Figure S40. Mass spectrum of 2-amino-4-(4-((2-fluorobenzyl)oxy)-3-methoxyphenyl)-7,7-dimethyl-5-oxo-5,6,7,8-tetrahydro-4H-chromene-3-carbonitrile(6j)



**K) spectra of compound 6k:**

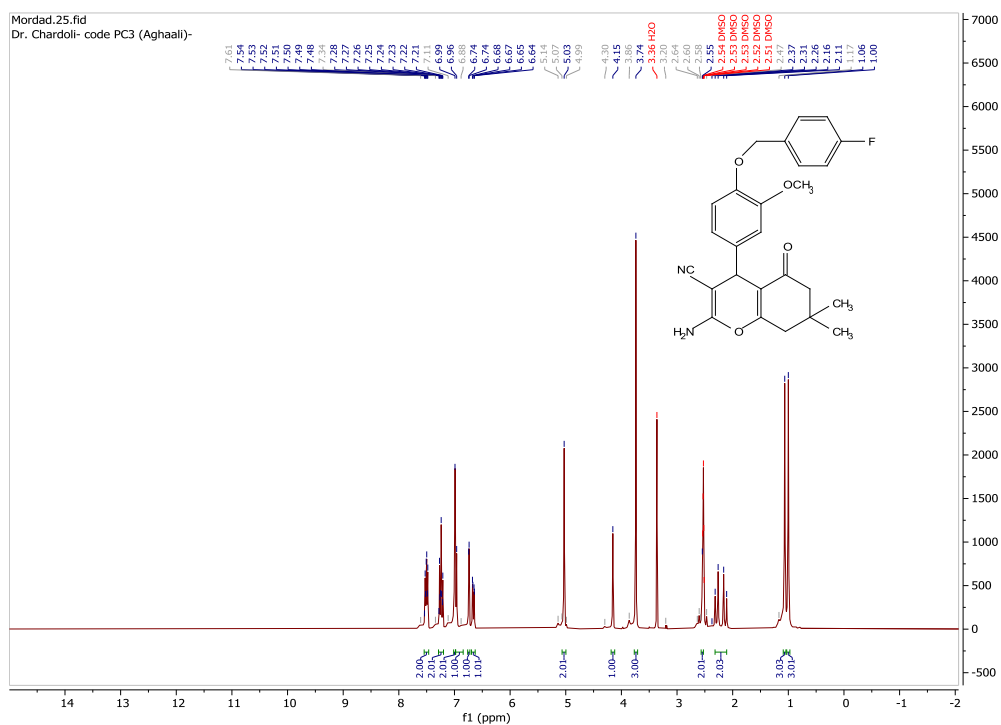

Figure S41. <sup>1</sup>H-NMR spectrum of 2-amino-4-(4-((4-fluorobenzyl)oxy)-3-methoxyphenyl)-7,7-dimethyl-5-oxo-5,6,7,8-tetrahydro-4H-chromene-3-carbonitrile(6k)

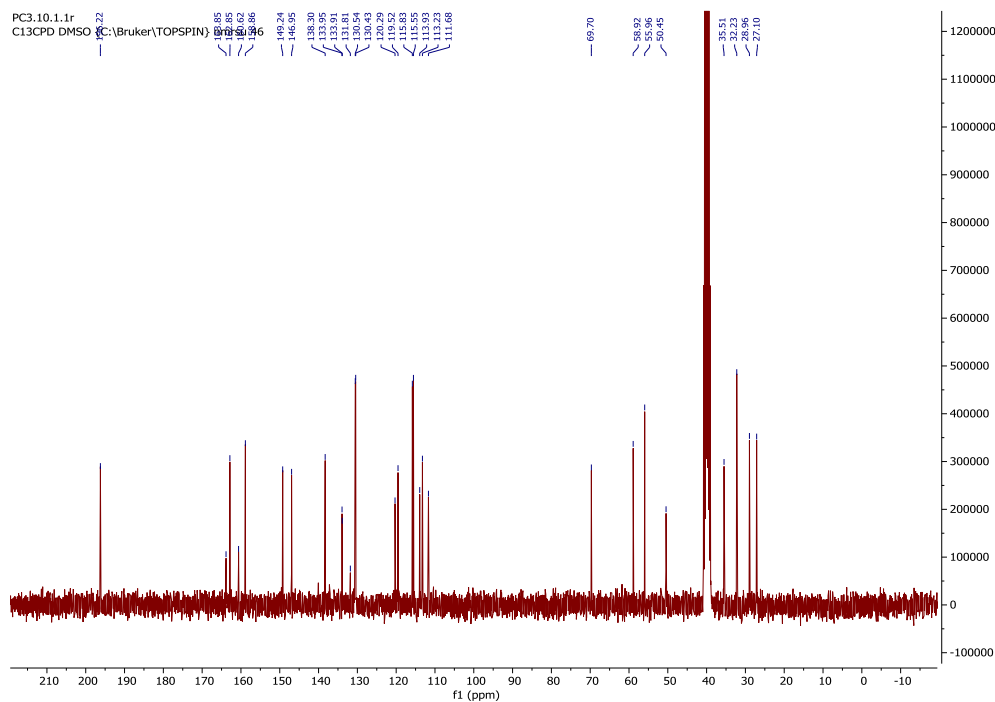

Figure S42.  $^{13}\text{C}$ -NMR spectrum of 2-amino-4-(4-((4-fluorobenzyl)oxy)-3-methoxyphenyl)-7,7-dimethyl-5-oxo-5,6,7,8-tetrahydro-4H-chromene-3-carbonitrile(6k)

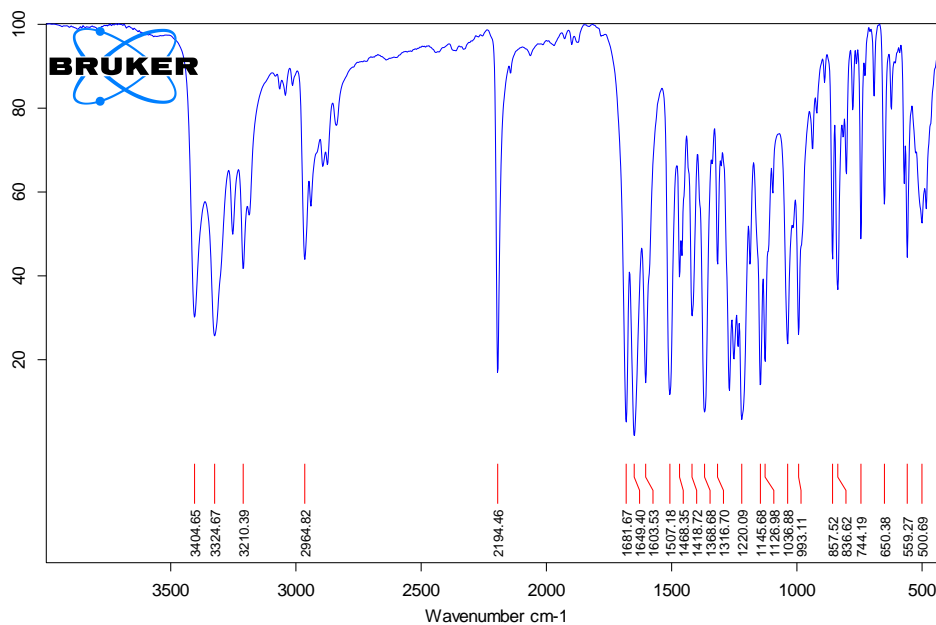

Figure S43. FT-IR spectrum of 2-amino-4-(4-((4-fluorobenzyl)oxy)-3-methoxyphenyl)-7,7-dimethyl-5-oxo-5,6,7,8-tetrahydro-4H-chromene-3-carbonitrile(6k)

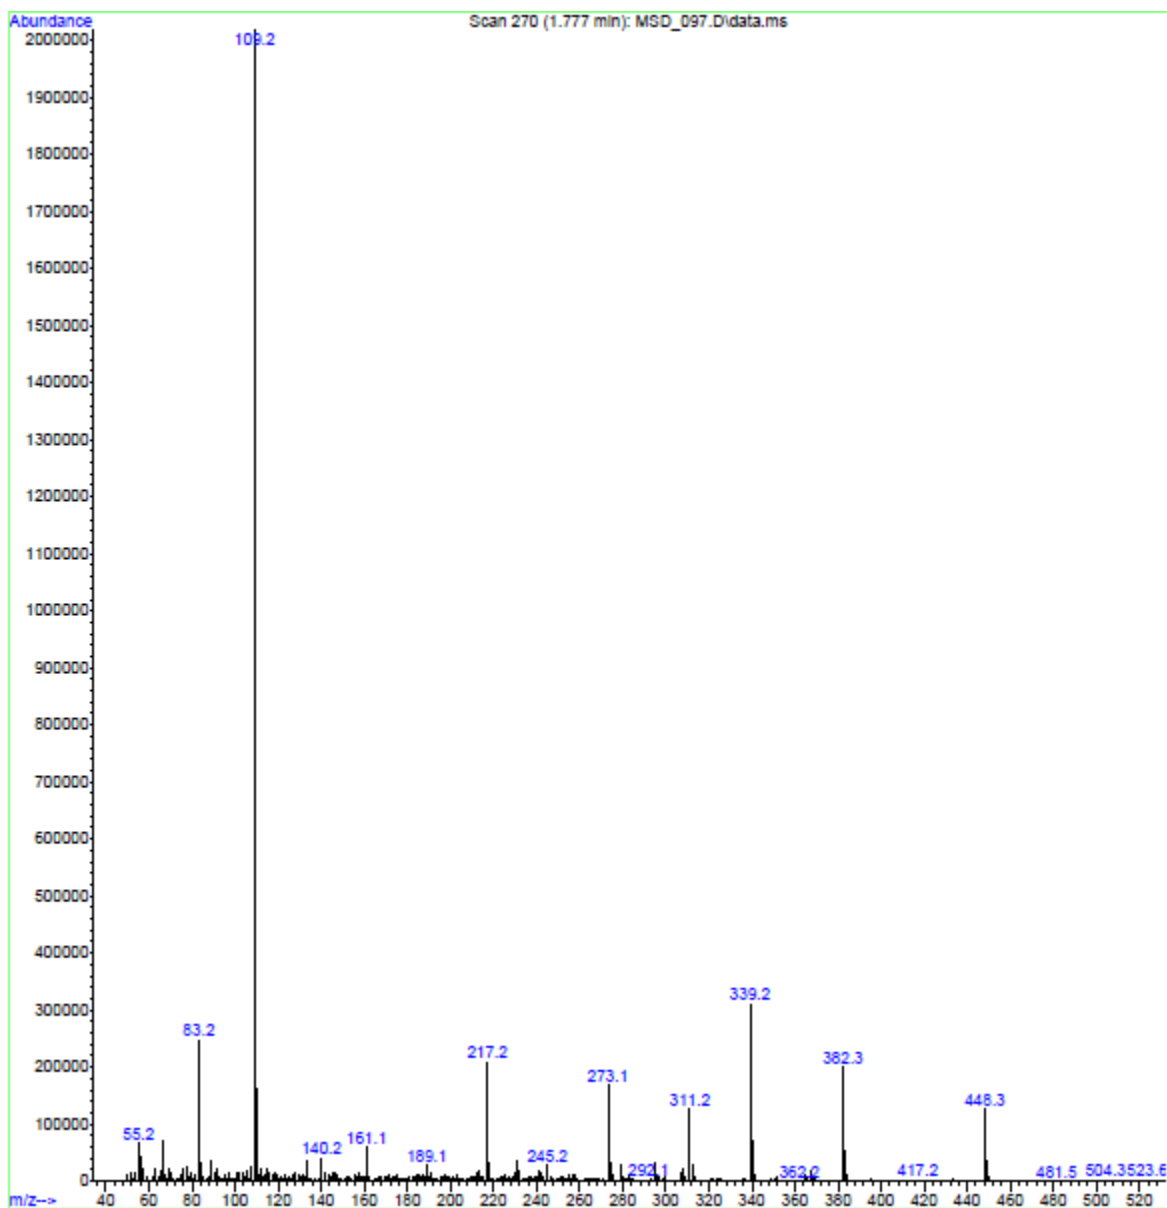

Figure S44. Mass spectrum of 2-amino-4-(4-((4-fluorobenzyl)oxy)-3-methoxyphenyl)-7,7-dimethyl-5-oxo-5,6,7,8-tetrahydro-4H-chromene-3-carbonitrile(6k)

**L) spectrums of compound 6l:**

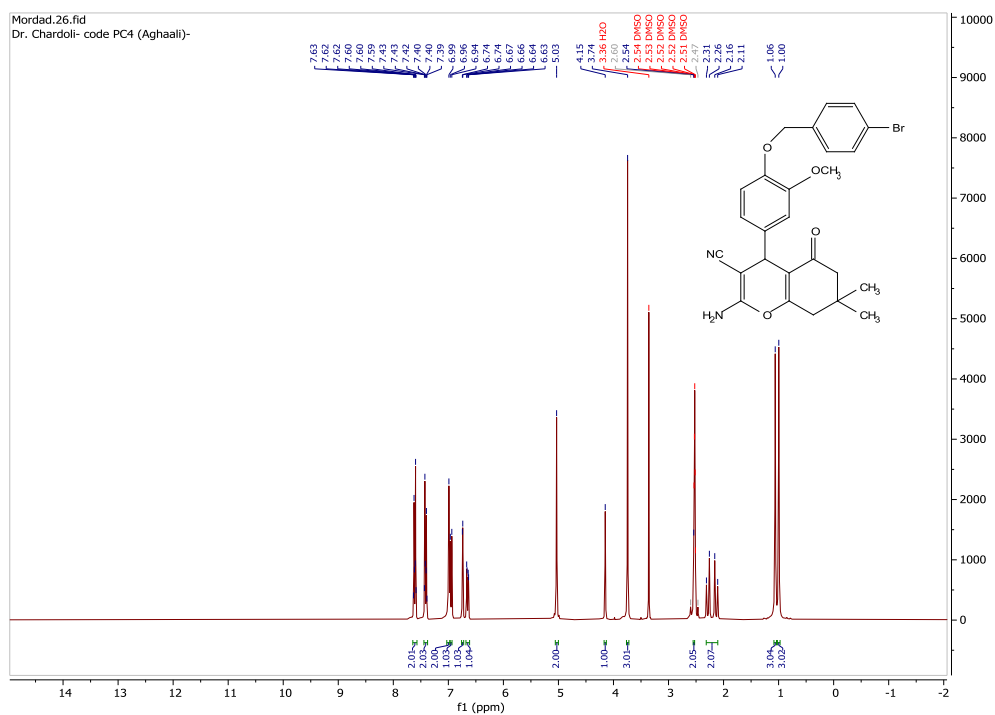

Figure S45. <sup>1</sup>H-NMR spectrum of 2-amino-4-(4-((4-bromobenzyl)oxy)-3-methoxyphenyl)-7,7-dimethyl-5-oxo-5,6,7,8-tetrahydro-4H-chromene-3-carbonitrile(6l)

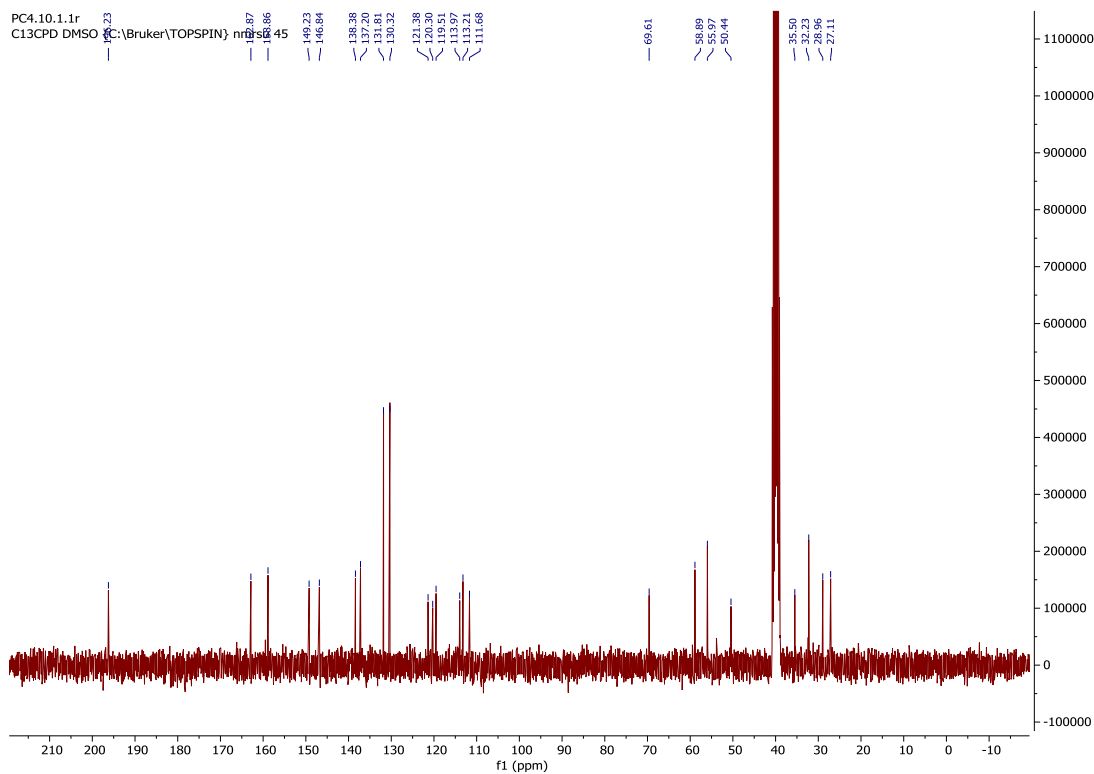

Figure S46.  $^{13}\text{C}$ -NMR spectrum of 2-amino-4-(4-((4-bromobenzyl)oxy)-3-methoxyphenyl)-7,7-dimethyl-5-oxo-5,6,7,8-tetrahydro-4H-chromene-3-carbonitrile(6l)

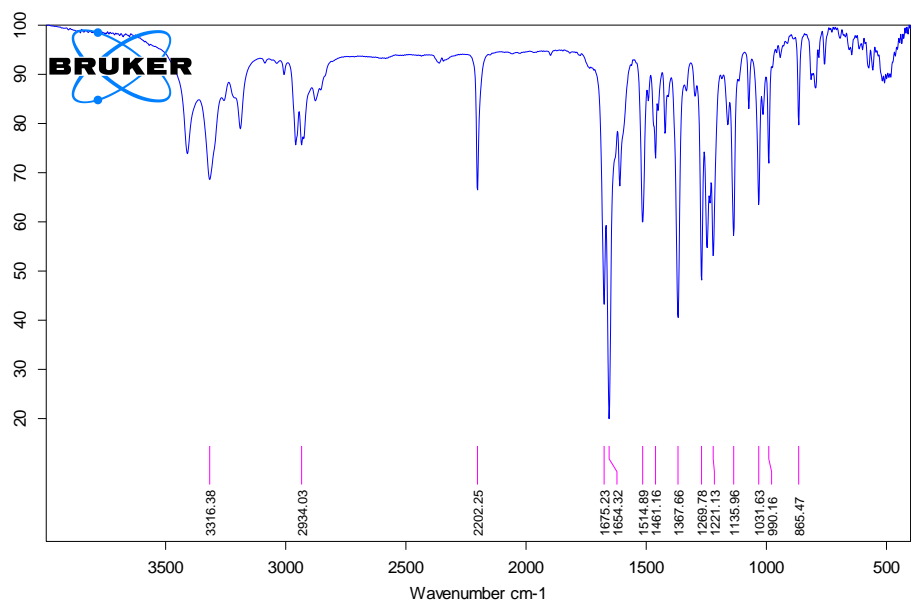

Figure S47. FT-IR spectrum of 2-amino-4-(4-((4-bromobenzyl)oxy)-3-methoxyphenyl)-7,7-dimethyl-5-oxo-5,6,7,8-tetrahydro-4H-chromene-3-carbonitrile(6l)

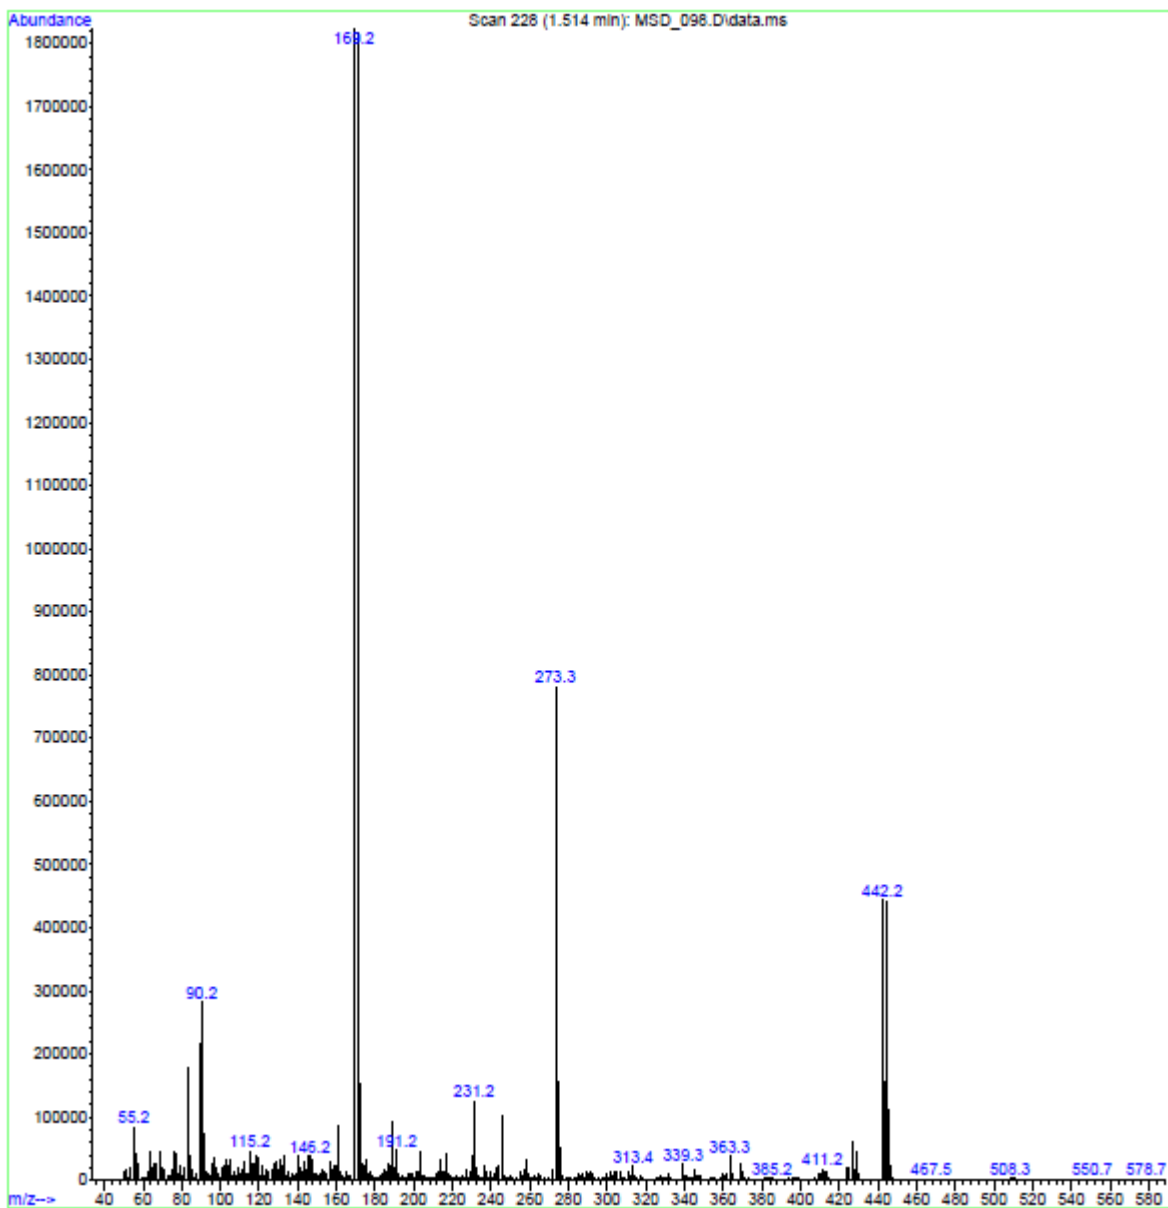

Figure S48. Mass spectrum of 2-amino-4-(4-((4-bromobenzyl)oxy)-3-methoxyphenyl)-7,7-dimethyl-5-oxo-5,6,7,8-tetrahydro-4H-chromene-3-carbonitrile(6l)



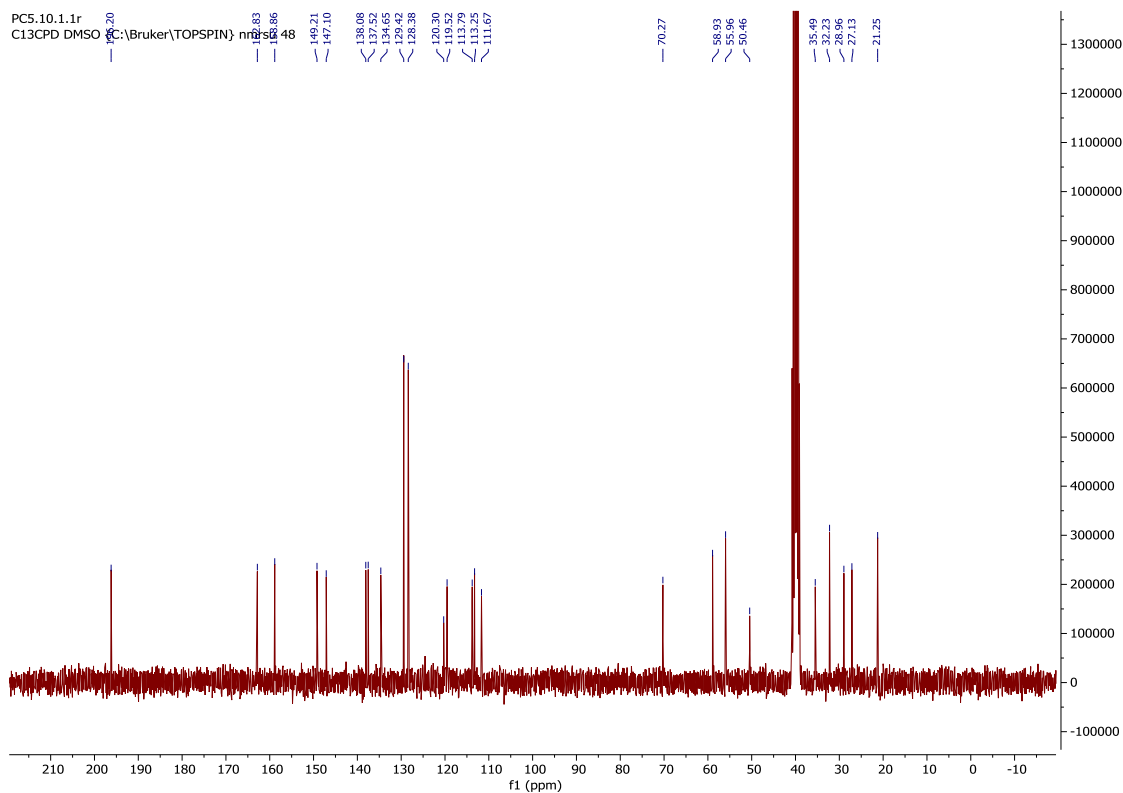

Figure S50.  $^{13}\text{C}$ -NMR spectrum of 2-amino-4-(3-methoxy-4-((4-methylbenzyl)oxy)phenyl)-7,7-dimethyl-5-oxo-5,6,7,8-tetrahydro-4H-chromene-3-carbonitrile(6m)

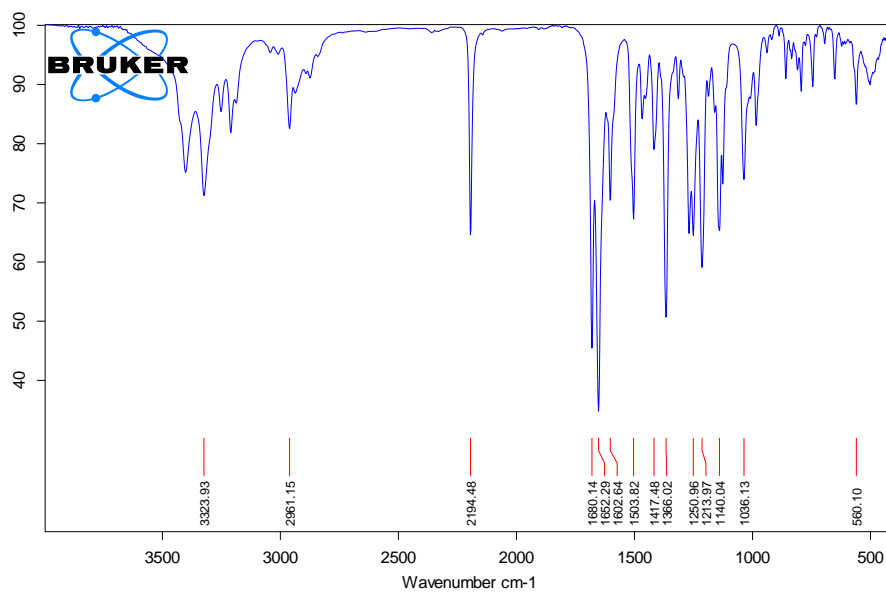

Figure S51. FT-IR spectrum of 2-amino-4-(3-methoxy-4-((4-methylbenzyl)oxy)phenyl)-7,7-dimethyl-5-oxo-5,6,7,8-tetrahydro-4H-chromene-3-carbonitrile(6m)



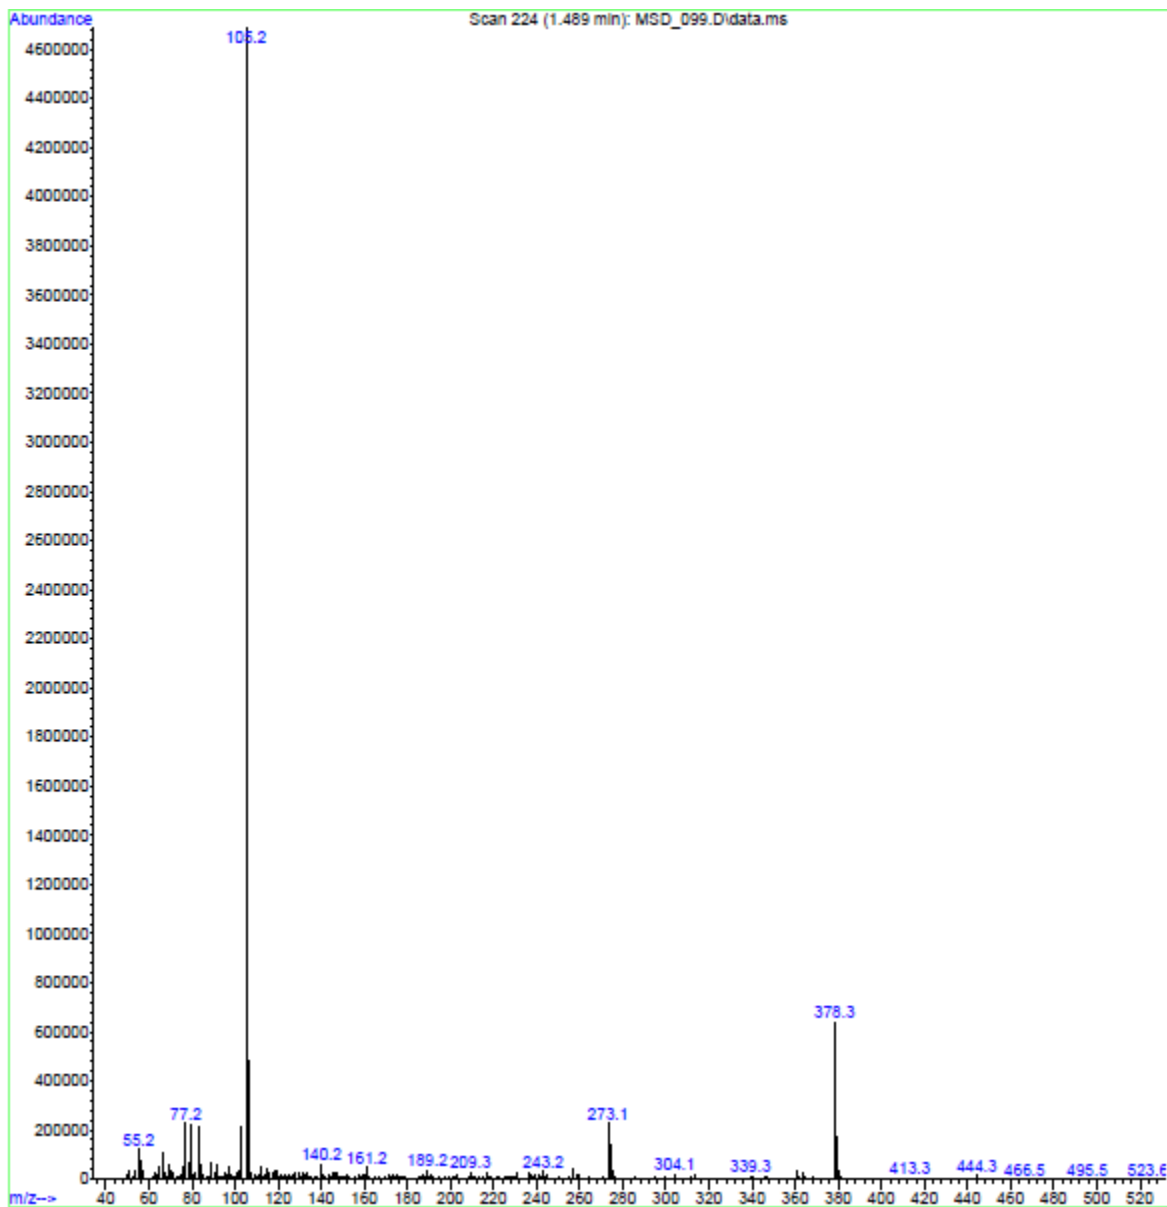

Figure S52. Mass spectrum of 2-amino-4-(3-methoxy-4-((4-methylbenzyl)oxy)phenyl)-7,7-dimethyl-5-oxo-5,6,7,8-tetrahydro-4H-chromene-3-carbonitrile(6m)

*N) spectrums of compound 6n:*

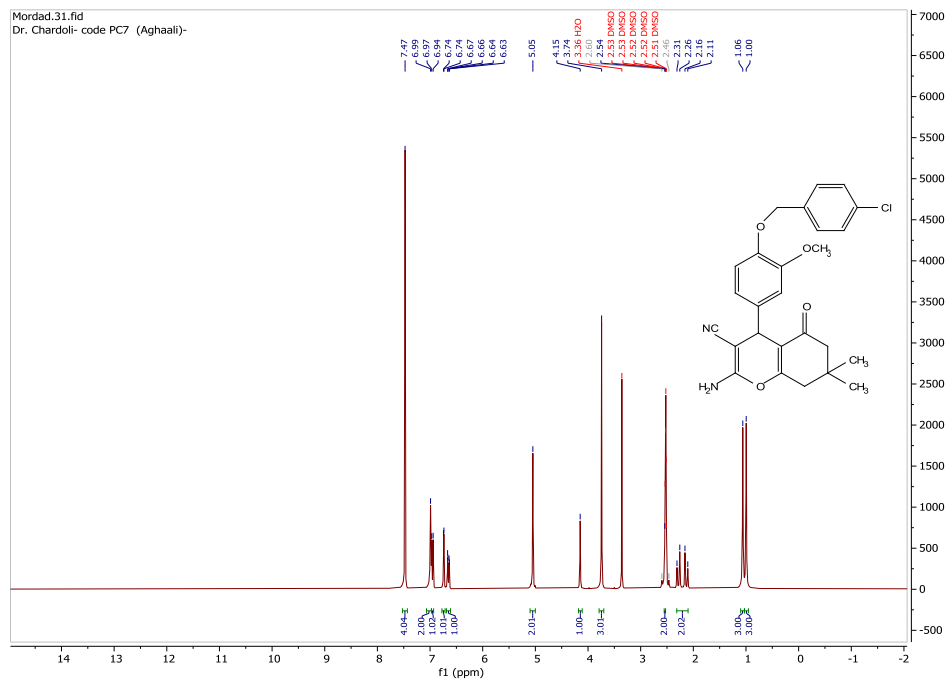

Figure S53. <sup>1</sup>H-NMR spectrum of 2-amino-4-(4-(4-chlorobenzyl)oxy)-3-methoxyphenyl)-7,7-dimethyl-5-oxo-5,6,7,8-tetrahydro-4H-chromene-3-carbonitrile(6n)

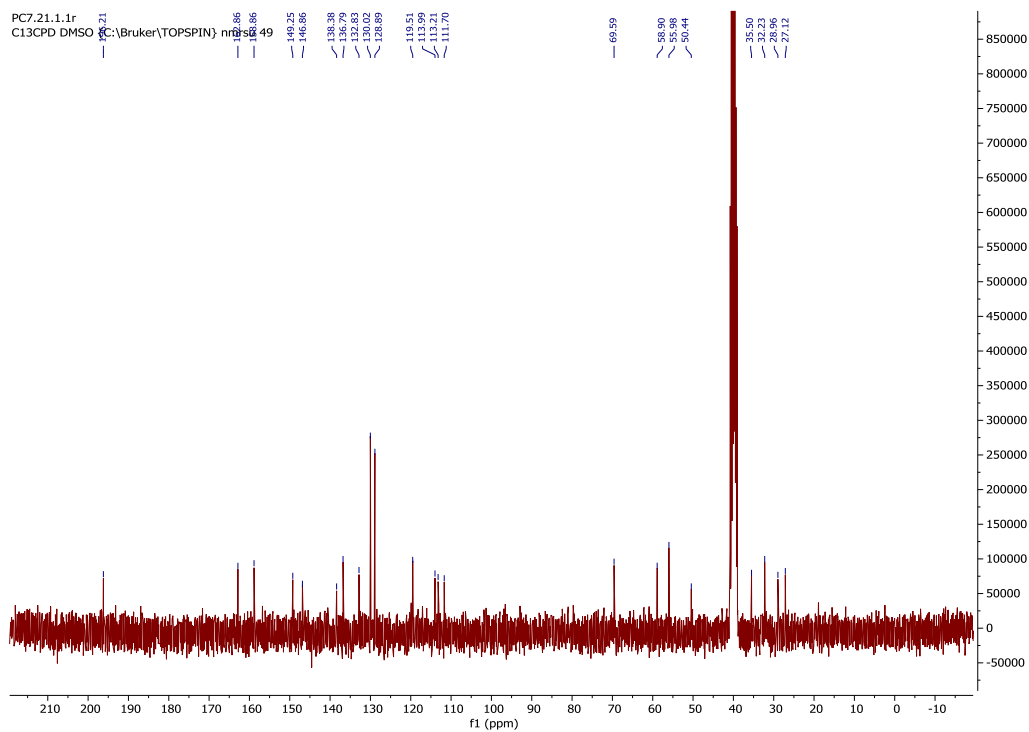

Figure S54.  $^{13}\text{C}$ -NMR spectrum of 2-amino-4-(4-(4-chlorobenzyl)oxy)-3-methoxyphenyl)-7,7-dimethyl-5-oxo-5,6,7,8-tetrahydro-4H-chromene-3-carbonitrile(6n)

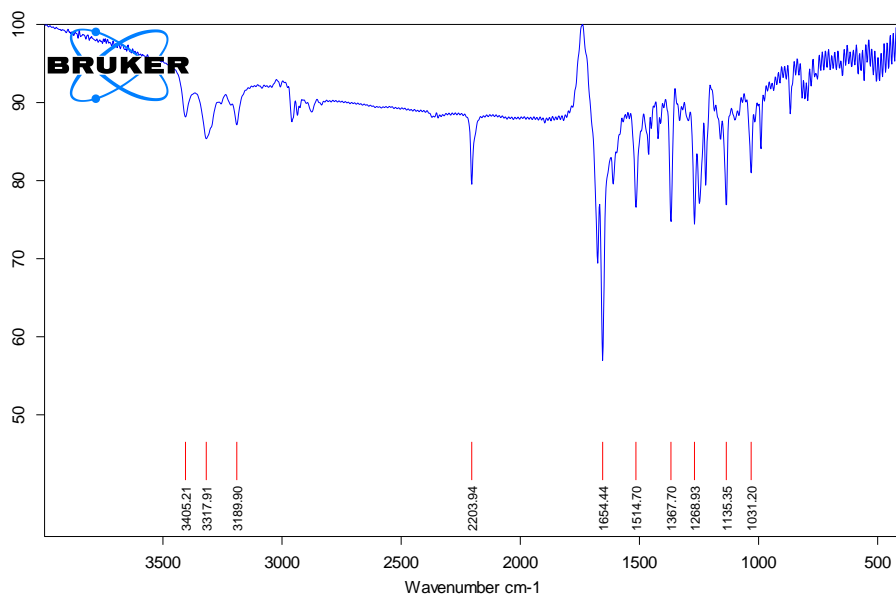

Figure S55. FT-IR spectrum of 2-amino-4-(4-(4-chlorobenzyl)oxy)-3-methoxyphenyl)-7,7-dimethyl-5-oxo-5,6,7,8-tetrahydro-4H-chromene-3-carbonitrile(6n)

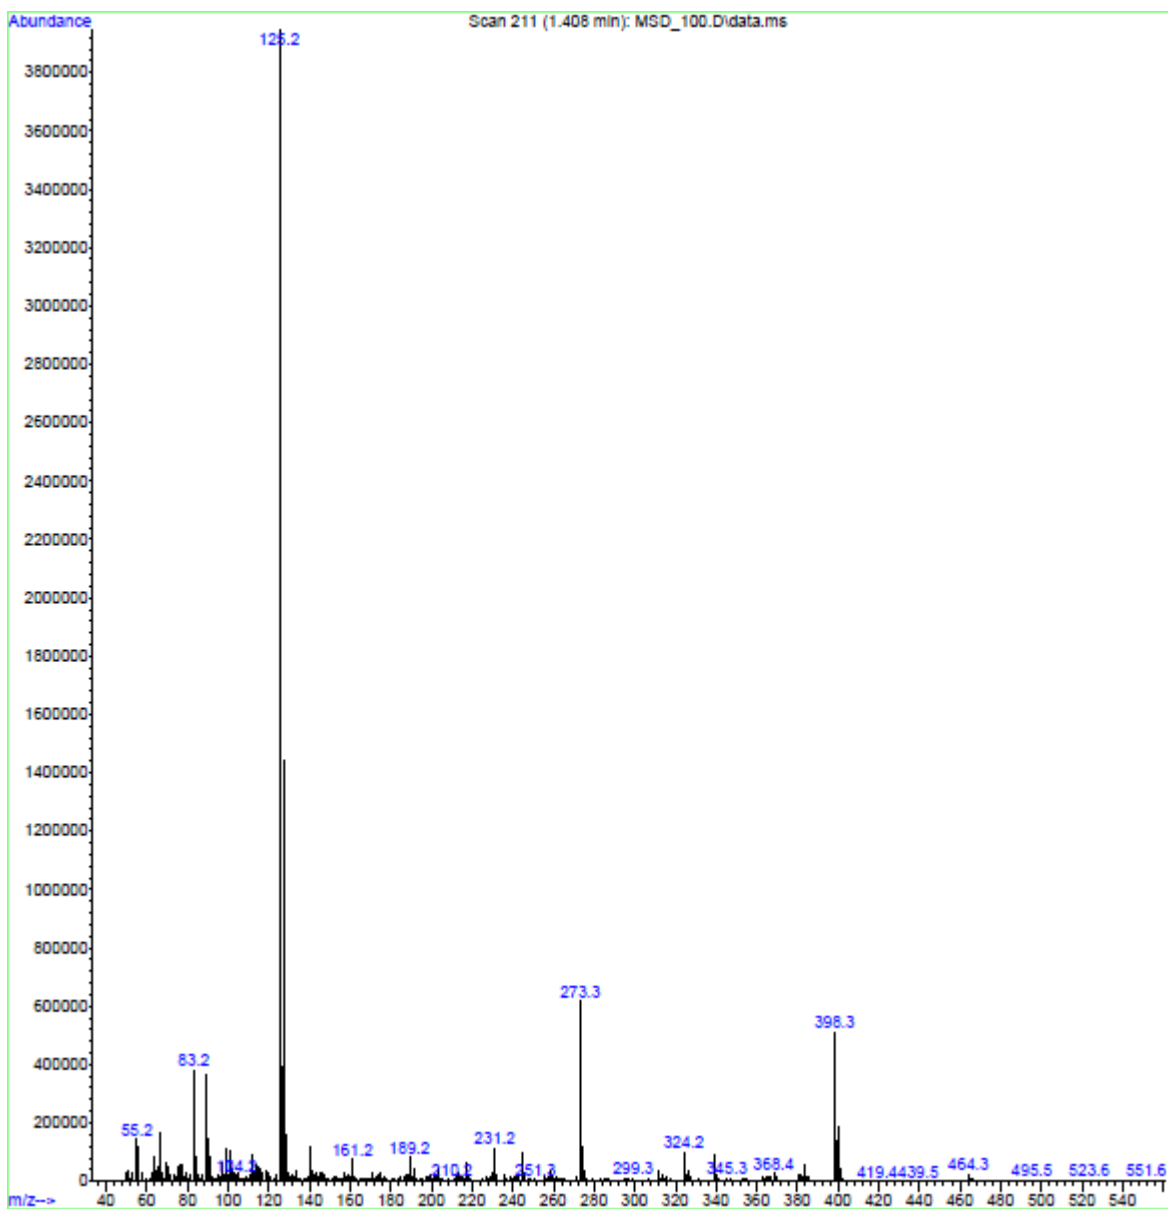

Figure S56. Mass spectrum of 2-amino-4-(4-((4-chlorobenzyl)oxy)-3-methoxyphenyl)-7,7-dimethyl-5-oxo-5,6,7,8-tetrahydro-4H-chromene-3-carbonitrile(6n)

**O) spectrums of compound 6o:**

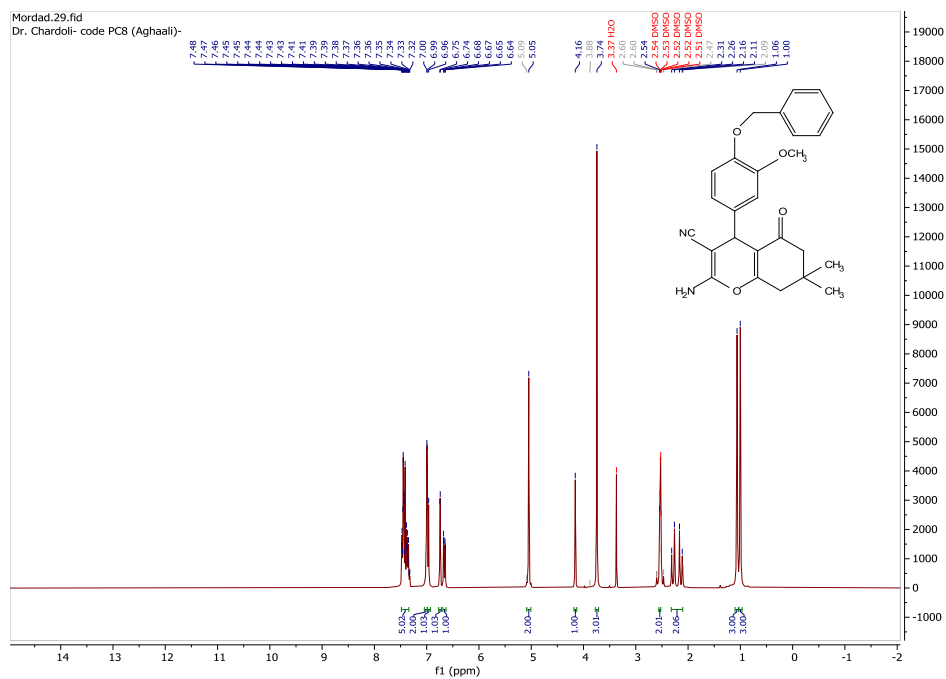

Figure S57. <sup>1</sup>H-NMR spectrum of 2-amino-4-(4-(benzyloxy)-3-methoxyphenyl)-7,7-dimethyl-5-oxo-5,6,7,8-tetrahydro-4H-chromene-3-carbonitrile(6o)

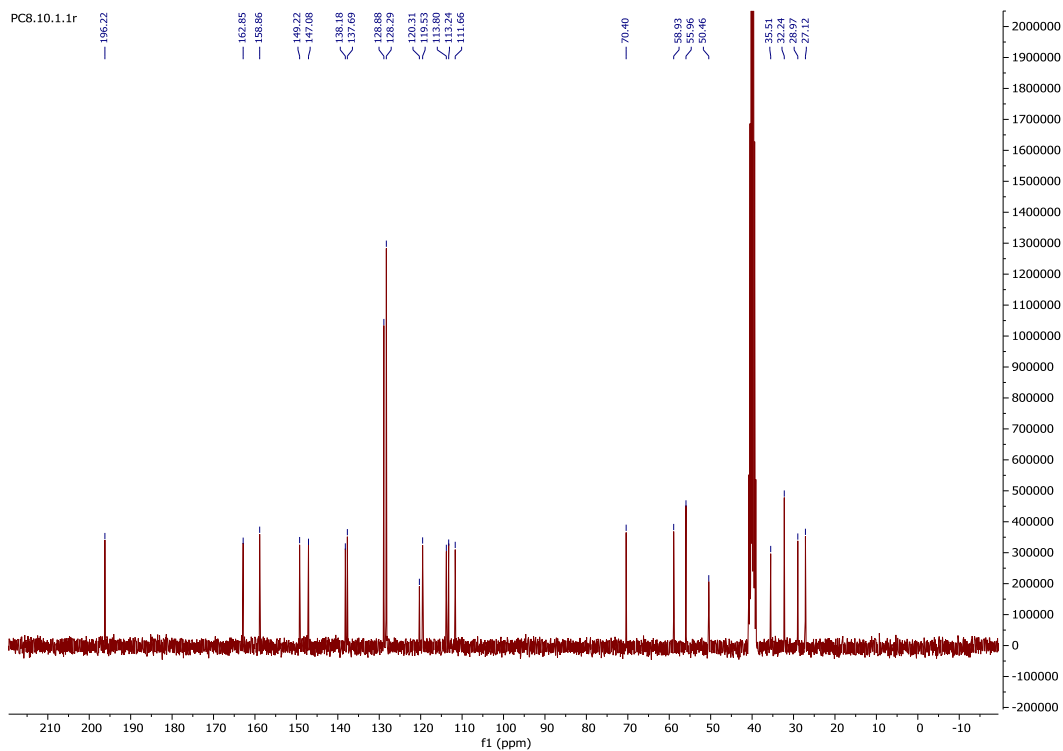

Figure S58.  $^{13}\text{C}$ -NMR spectrum of 2-amino-4-(4-(benzyloxy)-3-methoxyphenyl)-7,7-dimethyl-5-oxo-5,6,7,8-tetrahydro-4H-chromene-3-carbonitrile(6o)

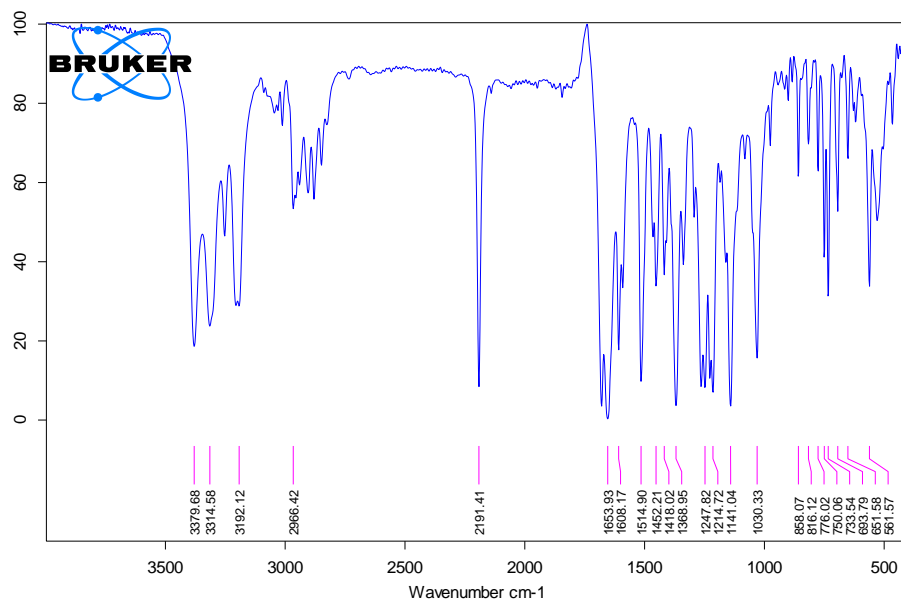

Figure S59. FT-IR spectrum of 2-amino-4-(4-(benzyloxy)-3-methoxyphenyl)-7,7-dimethyl-5-oxo-5,6,7,8-tetrahydro-4H-chromene-3-carbonitrile(6o)

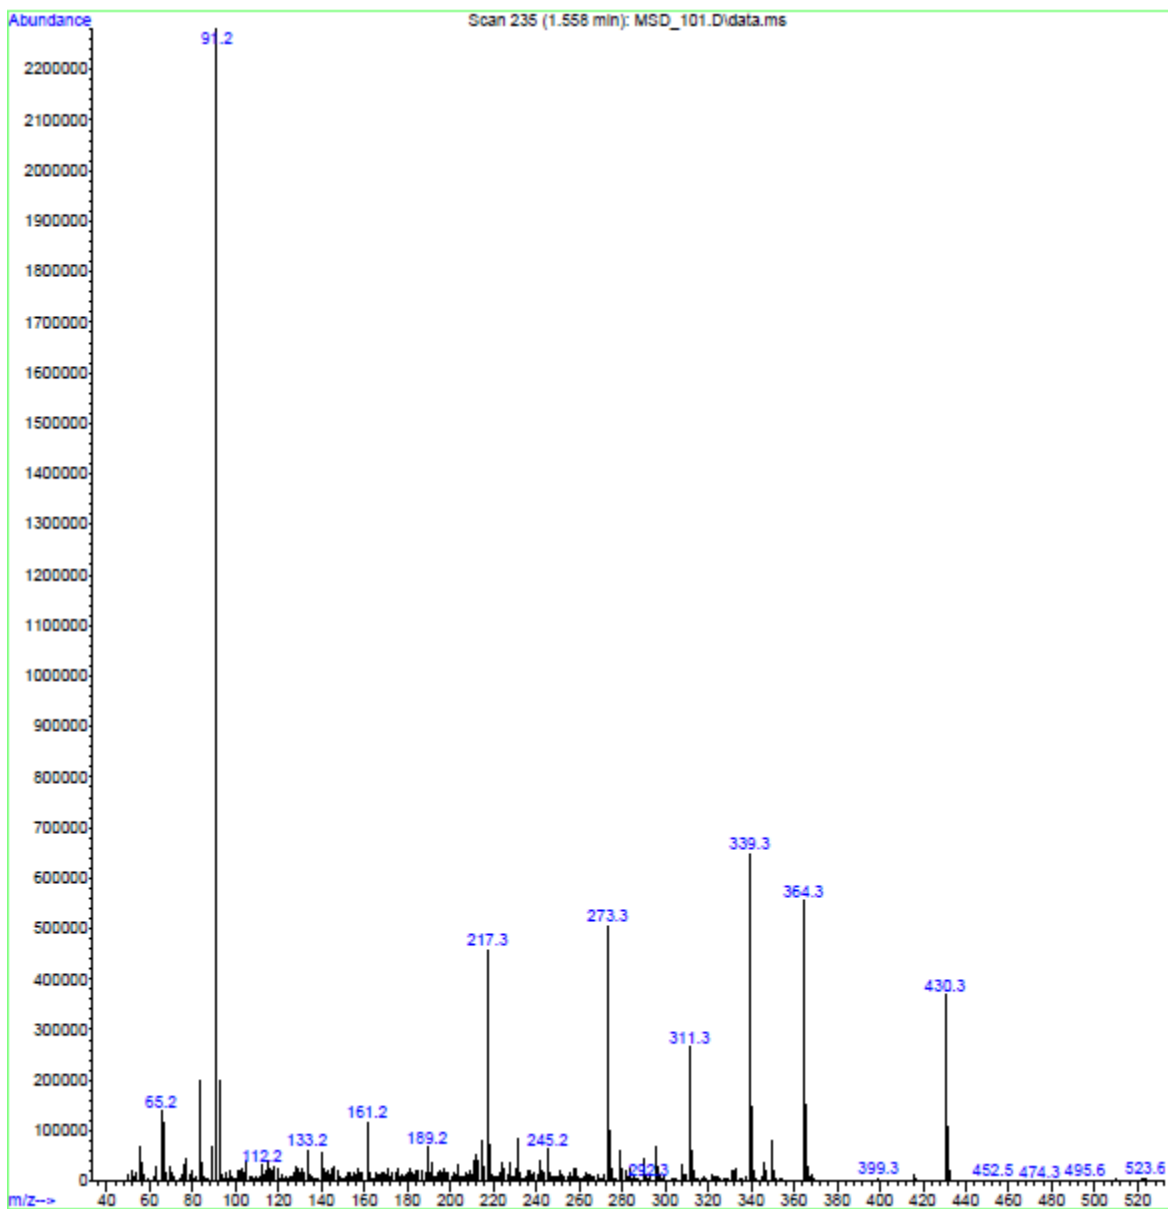

Figure S60. Mass spectrum of 2-amino-4-(4-(benzyloxy)-3-methoxyphenyl)-7,7-dimethyl-5-oxo-5,6,7,8-tetrahydro-4H-chromene-3-carbonitrile(6o)

**Table S1.** Molecular docking results of **6a-o** in the active site of tyrosinase

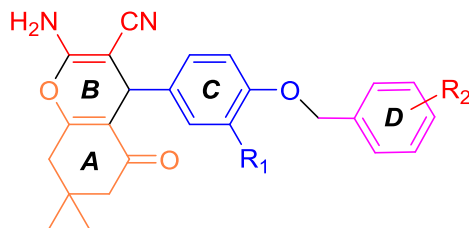

| Entry  | compounds   | R <sub>1</sub> | R <sub>2</sub>        | Estimated free energy of binding | Protein-Ligand Contacts |                                        |                             |
|--------|-------------|----------------|-----------------------|----------------------------------|-------------------------|----------------------------------------|-----------------------------|
|        |             |                |                       |                                  | Ligand moiety           | Enzyme residues                        | Type of interaction         |
| 1      | <b>R-6a</b> | H              | 3-F                   | -4.681                           | Fluorine                | GLY281,<br>SER282 and<br>MET280        | halogen-type<br>interaction |
|        |             |                |                       |                                  | Ring D                  | His263                                 | Pi-Pi stacked               |
|        |             |                |                       |                                  | Ring C                  | His85                                  | Pi-Pi stacked               |
|        |             |                |                       |                                  | Ring C and<br>Ring D    | Val283                                 | Pi-Alkyl                    |
| 2      | <b>R-6b</b> | H              | 2-F                   | -4.771                           | Fluorine                | His85                                  | halogen-type<br>interaction |
|        |             |                |                       |                                  | Amine                   | Glu322                                 | Hydrogen bond               |
|        |             |                |                       |                                  | Ring D                  | His263 and<br>Ser282                   | Pi-Pi stacked               |
|        |             |                |                       |                                  | Ring C and<br>ring D    | Val283                                 | Pi-Alkyl                    |
| 3      | <b>R-6c</b> | H              | 4-F                   | -4.893                           | Fluorine                | His61                                  | halogen-type<br>interaction |
|        |             |                |                       |                                  | Fluorine                | Cu                                     | Metal-Acceptor              |
|        |             |                |                       |                                  | Ring D                  | His263                                 | Pi-Pi stacked               |
|        |             |                |                       |                                  | Ring C                  | His85                                  | Pi-Pi stacked               |
|        |             |                |                       |                                  | Ring C and<br>ring D    | Val283                                 | Pi-Alkyl                    |
| 4      | <b>R-6d</b> | H              | 4-<br>Br              | -5.001                           | Ring D                  | Ala286                                 | Pi-Alkyl                    |
|        |             |                |                       |                                  | Bromine                 | Cu                                     | Metal-Acceptor              |
|        |             |                |                       |                                  | Bromine                 | His61, His259,<br>His296 and<br>His263 | Pi-Alkyl                    |
|        |             |                |                       |                                  | Ring D                  | His263 and<br>SER282                   | Pi-Pi stacked               |
|        |             |                |                       |                                  | Ring D                  | Ala286                                 | Pi-Alkyl                    |
|        |             |                |                       |                                  | Ring C and<br>ring D    | Val283                                 | Pi-Alkyl                    |
|        |             |                |                       |                                  | cyanide                 | His85                                  | Hydrogen bond               |
| Ring A | Val248      | Pi-Alkyl       |                       |                                  |                         |                                        |                             |
| 5      | <b>R-6e</b> | H              | 4-<br>CH <sub>3</sub> | -7.306                           | cyanide                 | His85                                  | Hydrogen bond               |
|        |             |                |                       |                                  | carbonyl                | Asn260                                 | Hydrogen bond               |
|        |             |                |                       |                                  | Ring A                  | Val248                                 | Pi-Alkyl                    |
|        |             |                |                       |                                  | Ring C                  | His85                                  | Pi-Pi stacked               |



|   |             |                  |      |        |                                |                                  |                               |
|---|-------------|------------------|------|--------|--------------------------------|----------------------------------|-------------------------------|
|   |             |                  |      |        | Ring C and ring D              | Val283                           | Pi-Alkyl                      |
|   |             |                  |      |        | Ring D                         | His263                           | Pi-Pi stacked                 |
|   |             |                  |      |        | Ring D                         | Ala286                           | Pi-Alkyl                      |
|   |             |                  |      |        | Methyl bonded to ring D        | Phe264                           | Pi-Alkyl                      |
| 6 | <b>R-6f</b> | H                | 4-CN | -5.44  | Ring A                         | Val248 and His244                | Pi-Alkyl                      |
|   |             |                  |      |        | Methyl groups bonded to ring A | His244                           | Pi-Alkyl                      |
|   |             |                  |      |        | Cyanide bonded to ring B       | Arg268                           | Hydrogen bond                 |
|   |             |                  |      |        | Ring C                         | Arg268                           | Pi-cation                     |
|   |             |                  |      |        | Ring C and ring D              | Val283                           | Pi-Alkyl                      |
|   |             |                  |      |        | Ring D                         | Ala286 and Val283                | Pi-Alkyl                      |
|   |             |                  |      |        | Ring D                         | His263                           | Pi-Pi stacked                 |
| 7 | <b>R-6g</b> | H                | 4-Cl | -4.858 | Amine                          | Glu322                           | Hydrogen bond                 |
|   |             |                  |      |        | Ring D                         | His259 and His85                 | Pi-Pi stacked                 |
|   |             |                  |      |        | Ring C and ring D              | Val283                           | Pi-Alkyl                      |
|   |             |                  |      |        | chlorine                       | Phe292, His296, His263 and His85 | Pi-Alkyl                      |
| 8 | <b>R-6h</b> | H                | H    | -4.921 | Carbonyl                       | His85                            | Hydrogen bond                 |
|   |             |                  |      |        | Ring C                         | His85                            | Pi-Pi stacked                 |
|   |             |                  |      |        | Oxygen bonded to ring C        | Asn260                           | Unfavorable Acceptor-Acceptor |
|   |             |                  |      |        | Ring C and ring D              | Val283                           | Pi-Alkyl                      |
|   |             |                  |      |        | Ring D                         | His263                           | Pi-Pi stacked                 |
|   |             |                  |      |        | Ring D                         | Ala286                           | Pi-Alkyl                      |
| 9 | <b>R-6i</b> | OCH <sub>3</sub> | 3-F  | -4.744 | Carbonyl                       | Arg268                           | Hydrogen bond                 |
|   |             |                  |      |        | Methyl group bonded to ring A  | Phe192                           | Pi-Alkyl                      |
|   |             |                  |      |        | Ring A                         | Pro284                           | Pi-Alkyl                      |
|   |             |                  |      |        | Ring C and ring D              | Val283                           | Pi-Alkyl                      |
|   |             |                  |      |        | Ring D                         | Ser282 and His263                | Pi-Pi stacked                 |
|   |             |                  |      |        | Ring D                         | Ala286                           | Pi-Alkyl                      |
|   |             |                  |      |        | Fluorine                       | Asn260                           | halogen-type interaction      |

|    |             |                  |                       |        |                                                           |                              |                             |
|----|-------------|------------------|-----------------------|--------|-----------------------------------------------------------|------------------------------|-----------------------------|
| 10 | <b>R-6j</b> | OCH <sub>3</sub> | 2-F                   | -4.915 | Methoxy,<br>oxygen<br>bonded to ring<br>C and<br>Fluorine | Asn260                       | Hydrogen bond               |
|    |             |                  |                       |        | Ring D                                                    | Phe264                       | Pi-Pi stacked               |
|    |             |                  |                       |        | Ring D                                                    | Val283                       | Pi-Alkyl                    |
| 11 | <b>R-6k</b> | OCH <sub>3</sub> | 4-F                   | -5.403 | Carbonyl                                                  | His85 and Asn81              | Hydrogen bond               |
|    |             |                  |                       |        | Ring A                                                    | Arg321                       | Pi-Alkyl                    |
|    |             |                  |                       |        | Ring C and<br>ring D                                      | Val283                       | Pi-Alkyl                    |
|    |             |                  |                       |        | Ring D                                                    | His263                       | Pi-Pi stacked               |
|    |             |                  |                       |        | Fluorine                                                  | Met280                       | halogen-type<br>interaction |
| 12 | <b>R-6l</b> | OCH <sub>3</sub> | 4-<br>Br              | -5.136 | Amine                                                     | Ala246                       | Hydrogen bond               |
|    |             |                  |                       |        | cyanide                                                   | Val248                       | Hydrogen bond               |
|    |             |                  |                       |        | Ring C                                                    | Val248                       | Pi-Alkyl                    |
|    |             |                  |                       |        | Ring C and<br>ring D                                      | Val283                       | Pi-Alkyl                    |
|    |             |                  |                       |        | Ring D                                                    | His259 and<br>His85          | Pi-Pi stacked               |
|    |             |                  |                       |        | Bromine                                                   | His263, Ala286<br>and His259 | Pi-Alkyl                    |
| 13 | <b>R-6m</b> | OCH <sub>3</sub> | 4-<br>CH <sub>3</sub> | -6.042 | Carbonyl                                                  | Asn81 and His85              | Hydrogen bond               |
|    |             |                  |                       |        | Ring C and<br>ring D                                      | Val283                       | Pi-Alkyl                    |
|    |             |                  |                       |        | Methyl group<br>bonded to D                               | Phe264                       | Pi-Alkyl                    |
| 14 | <b>R-6n</b> | OCH <sub>3</sub> | 4-<br>Cl              | -5.337 | Amine                                                     | Glu322                       | Hydrogen bond               |
|    |             |                  |                       |        | Ring A and<br>Chlorine                                    | His85                        | Pi-Alkyl                    |
|    |             |                  |                       |        | Ring C and<br>ring D                                      | Val283                       | Pi-Alkyl                    |
|    |             |                  |                       |        | Ring D                                                    | His259 and<br>His263         | Pi-Pi stacked               |
|    |             |                  |                       |        | Chlorine                                                  | His259, His263<br>and His296 | Pi-Alkyl                    |
|    |             |                  |                       |        | Chlorine                                                  | Cu                           | Metal-acceptor              |
| 15 | <b>R-6o</b> | OCH <sub>3</sub> | H                     | -5.184 | Ring A                                                    | Val248                       | Pi-Alkyl                    |
|    |             |                  |                       |        | Methyl groups<br>bonded to ring<br>A                      | Phe264                       | Pi-Alkyl                    |
|    |             |                  |                       |        | Cyanide                                                   | His85                        | Hydrogen bond               |
|    |             |                  |                       |        | Ring C                                                    | His85                        | Pi-Pi stacked               |
|    |             |                  |                       |        | Ring D                                                    | His263 and<br>Phe264         | Pi-Pi stacked               |
|    |             |                  |                       |        | Hydrogen at<br>the para<br>position of<br>ring D          | Phe264                       | Pi-sigma                    |
